1 **Modeling the Human Segmentation Clock with Pluripotent Stem Cells**

2

3 Mitsuhiro Matsuda<sup>1,10</sup>, Yoshihiro Yamanaka<sup>2,10</sup>, Maya Uemura<sup>2,3</sup>, Mitsujiro Osawa<sup>4</sup>,  
4 Megumu K. Saito<sup>4</sup>, Ayako Nagahashi<sup>4</sup>, Megumi Nishio<sup>3</sup>, Long Guo<sup>5</sup>, Shiro Ikegawa<sup>5</sup>,  
5 Satoko Sakurai<sup>6</sup>, Shunsuke Kihara<sup>7</sup>, Michiko Nakamura<sup>6</sup>, Tomoko Matsumoto<sup>6</sup>, Hiroyuki  
6 Yoshitomi<sup>2,3</sup>, Makoto Ikeya<sup>6</sup>, Takuya Yamamoto<sup>6,8</sup>, Knut Woltjen<sup>6,9</sup>, Miki Ebisuya<sup>1\*</sup>,  
7 Junya Toguchida<sup>2,3</sup>, Cantas Alev<sup>2\*</sup>

8

9 <sup>1</sup> Laboratory for Reconstitutive Developmental Biology, RIKEN Center for Biosystems  
10 Dynamics Research (RIKEN BDR), Kobe 650-0047, Japan.

11 <sup>2</sup> Department of Cell Growth and Differentiation, Center for iPS Cell Research and  
12 Application (CiRA), Kyoto University, Kyoto 606-8507, Japan.

13 <sup>3</sup> Department of Regeneration Science and Engineering, Institute for Frontier Life and  
14 Medical Sciences, Kyoto University, Kyoto 606-8507, Japan.

15 <sup>4</sup> Department of Clinical Application, Center for iPS Cell Research and Application  
16 (CiRA), Kyoto University, Kyoto 606-8507, Japan.

17 <sup>5</sup> Laboratory for Bone and Joint Diseases, RIKEN Center for Integrative Medical  
18 Sciences (RIKEN IMS), Tokyo 108-8639, Japan.

19 <sup>6</sup> Department of Life Science Frontiers, Center for iPS Cell Research and Application  
20 (CiRA), Kyoto University, 606-8507, Kyoto 108-8639, Japan.

21 <sup>7</sup> Department of Fundamental Cell Technology, Center for iPS Cell Research and  
22 Application (CiRA), Kyoto University, Kyoto 606-8507, Japan.

23 <sup>8</sup> AMED-CREST, AMED 1-7-1 Otemachi, Chiyodaku, Tokyo 100-004, Japan.

24 <sup>9</sup> Hakubi Center for Advanced Research, Kyoto University, Kyoto 606-8501, Japan.

25 <sup>10</sup> These authors contributed equally to this work

26

27 **\* To whom correspondence should be addressed:**

28 Cantas Alev, M.D., Ph.D. (lead contact)

29 E-Mail: [alev@cira.kyoto-u.ac.jp](mailto:alev@cira.kyoto-u.ac.jp)

30

31 Miki Ebisuya, Ph.D.

32 E-Mail: [miki.ebisuya@riken.jp](mailto:miki.ebisuya@riken.jp)

33

34 **Keywords:** segmentation clock, somitogenesis, human mesoderm development, induced  
35 pluripotent stem cells, step-wise *in vitro* mesoderm differentiation, disease modeling

36 **Pluripotent stem cells (PSCs) have increasingly been used to model different aspects**  
37 **of embryogenesis and organ formation<sup>1</sup>. Despite recent advances in the *in vitro***  
38 **induction of major mesodermal lineages and mesoderm-derived cell types<sup>2,3</sup>,**  
39 **experimental model systems that can recapitulate more complex biological features**  
40 **of human mesoderm development and patterning are largely missing. Here, we**  
41 **utilized induced pluripotent stem cells (iPSCs) for the stepwise *in vitro* induction of**  
42 **presomitic mesoderm (PSM) and its derivatives to model distinct aspects of human**  
43 **somitogenesis. We focused initially on modeling the human segmentation clock, a**  
44 **major biological concept believed to underlie the rhythmic and controlled**  
45 **emergence of somites, which give rise to the segmental pattern of the vertebrate**  
46 **axial skeleton. We succeeded to observe oscillatory expression of core segmentation**  
47 **clock genes, including *HES7* and *DKK1*, and identified novel oscillatory genes in**  
48 **human iPSC-derived PSM. We furthermore determined the period of the human**  
49 **segmentation clock to be around five hours and showed the presence of dynamic**  
50 **traveling wave-like gene expression within *in vitro* induced human PSM. Utilizing**  
51 **CRISPR/Cas9-based genome editing technology, we then targeted genes, for which**  
52 **mutations in patients with abnormal axial skeletal development such as**  
53 ***spondylocostal dysostosis* (SCD) (*HES7*, *LFNG* and *DLL3*) or *spondylothoracic***  
54 ***dysostosis* (STD) (*MESP2*) have been reported. Subsequent analysis of patient-like**  
55 **iPSC knock-out lines as well as patient-derived iPSCs together with their genetically**  
56 **corrected isogenic controls revealed gene-specific alterations in oscillation,**  
57 **synchronization or differentiation properties, validating the overall utility of our**  
58 **model system, to recapitulate not only key features of human somitogenesis but also**  
59 **to provide novel insights into diseases associated with the formation and patterning**  
60 **of the human axial skeleton.**

61 We initially aimed to mimic and recreate *in vitro* the signaling events responsible  
62 for the step-wise emergence of PSM and its derivatives during embryonic development,  
63 as also recently attempted by others<sup>2,4,5</sup>, via selective activation or inhibition of  
64 appropriate signaling pathways, using human iPSCs as starting material (Fig. 1a). We  
65 characterized the ability of our *in vitro* induced human PSM cells to differentiate into  
66 somitic mesoderm and its two main derivatives, sclerotome and dermomyotome, which  
67 give rise to bone and cartilage of the axial skeleton and skeletal muscle and dermis of the  
68 emerging embryo respectively. RNA-sequencing (RNA-seq) analysis and subsequent  
69 characterization of *in vitro* derived human PSM samples revealed, that at each step of our  
70 induction and differentiation protocol, markers expected to be present based on either  
71 embryological studies in animal models or recent reports utilizing stem cells<sup>2,4-6</sup>, were  
72 appropriately expressed at both transcript and protein levels (Fig. 1b-f, Extended Data  
73 Fig. 1a-f, Extended Data Table 1), indicating that our step-wise approach is following the  
74 developmental trajectory and recapitulating ontogeny seen during embryonic somitic  
75 mesoderm development.

76 We detected in our *in vitro* derived human PSM samples expression of *TBX6* and  
77 *DLL1*, two well-established markers of presomitic mesoderm<sup>7</sup>, at transcript and protein  
78 levels (Fig. 1d-f, Extended Data Fig. 1d-f). We also detected high-level expression of  
79 *HES7*, a known regulator of the segmentation clock in murine PSM<sup>8</sup> (Fig. 1b, Extended  
80 Data Fig. 1c). Based on this observation we generated a luciferase-based iPSC reporter  
81 line for human *HES7* promoter activity (HES7-reporter). We observed clear oscillation of

82 the HES7-reporter in our human PSM samples (Fig. 1g) and determined the period of the  
83 human segmentation clock to be 5-6 hours, which is similar to the 4-6 hour period  
84 reported for somite formation in primary human embryo samples<sup>9,10</sup>. To our knowledge,  
85 this is the first real-time observation of oscillatory expression in the human segmentation  
86 clock.

87 We then asked, whether we could also observe traveling wave-like expression,  
88 another hallmark of the segmentation clock, which is caused by the synchronization  
89 among oscillations in neighboring cells. Such traveling waves have been reported in the  
90 context of explant studies utilizing reporter mice and mouse ESC-derived PSM<sup>11,12</sup>, but  
91 have never been observed in human PSM. Using a sphere of human PSM induced in 3D  
92 culture, we could see sustained oscillation and the clear presence of traveling waves  
93 (Extended Data Movie 1), which is also indicated by the tilted slope in the kymograph  
94 (Fig. 1h).

95 In order to ensure that our *in vitro*-derived PSM is indeed comparable to its *in*  
96 *vivo* counterpart, we further characterized its differentiation capacity into somitic  
97 mesoderm, sclerotome and dermomyotome. To induce somitic mesoderm we mimicked  
98 the decrease in Fgf and Wnt activity along the posterior-anterior axis of the PSM reported  
99 in the embryonic context<sup>13</sup>, by simultaneous inhibition of both pathways, leading to the  
100 rapid and robust induction of somitic mesoderm expressing *TCF15*, a well established  
101 marker of somite development<sup>14</sup>, at the transcript (Fig. 1b, Extended Data Fig. 1c) and the  
102 protein level (Extended Data Fig. 1g). In addition, *MESP2*, a marker of segmentation  
103 during somitogenesis, showed localized albeit weak expression in induced human somitic  
104 mesoderm, similar to the remnant expression of *TBX6* at this stage, indicating that,  
105 despite a strong signal for differentiation, patterning reminiscent of somite segmentation  
106 might take place *in vitro*, as recently shown for mouse ESC-derived PSM<sup>12</sup> (Extended  
107 Data Fig. 1g, right side of panel). Furthermore, dermomyotome and sclerotome cells  
108 derived from *in vitro* induced human somitic mesoderm expressed appropriate  
109 developmental stage-specific markers at the transcript and protein level (Extended Data  
110 Fig. 1c, 2a). To further demonstrate that our induced human somitic mesoderm and the  
111 sclerotome derived thereof, is, indeed functional and can give rise to cartilage and bone,  
112 as seen during embryogenesis<sup>15</sup>, we performed *in vitro* and *in vivo* differentiation and  
113 transplantation assays (Extended Data Fig. 2b-e). As also recently reported by others<sup>4</sup>, we  
114 could see self-organization of bone and cartilage, including properly patterned  
115 endochondral bone, from transplanted human sclerotome cells *in vivo* (Fig. 1i, Extended  
116 Data Fig. 2b, 2c, 2e). We then examined our *in vitro* induced dermomyotome cells for  
117 their ability to give rise to human skeletal muscle *in vitro*. We could observe robust  
118 induction of skeletal muscle cells, showing expression of proper muscle markers at the  
119 protein level (Fig. 1j, Extended Data Fig. 2f). Functional analysis of dermomyotome cells  
120 derived from a calcium reporter iPSC line (Gen1C) revealed the reproducible presence of  
121 beating skeletal muscle cells after three weeks of *in vitro* 2D differentiation culture (Fig.  
122 1j, Extended Data Movie 2). We thus showed that our *in vitro* step-wise induction  
123 protocol can give rise to human PSM cells and their proper derivatives that appear to  
124 recapitulate key features of their corresponding developmental counterparts and  
125 respective embryological stages.

126 Since the oscillation and synchronization in human PSM have never been  
127 characterized before, we asked whether we could deepen our understanding of the human

128 segmentation clock even further, using the experimental system at hand. To this end we  
129 collected PSM samples during oscillation by monitoring the oscillatory activity of the  
130 HES7-reporter (Extended Data Fig. 3a) and performed RNA-seq analysis of the isolated  
131 RNA samples (16 samples each for two independent sets of experiments).

132 Our NGS-based analysis of the different PSM time-points revealed a core-set of  
133 about two hundred oscillating genes (Fig. 2a, Extended Data Table 2). Pathway and gene  
134 ontology (GO) analysis of the identified gene clusters revealed that in addition to  
135 enrichment of pathway members previously associated with the segmentation clock, such  
136 as Notch, Wnt or Fgf signaling<sup>16,17</sup> novel pathways were also represented in our data set,  
137 including members of the TGF $\beta$  pathway or Hippo signaling (Fig. 2b, Extended Data Fig.  
138 3b, Extended Data Table 3). Interestingly, the Hippo pathway component YAP was  
139 recently reported to be an important regulator of oscillatory activity in mouse PSM<sup>18</sup>,  
140 suggesting that this role might be conserved in human PSM, which showed oscillatory  
141 activity of core Hippo pathway components (*TEAD4*, *AMOTL2*) (Fig. 2a, 2b, Extended  
142 Data Fig. 3b). We also detected several HOX genes showing oscillatory expression in  
143 human PSM (*HOXA3*, *HOXA5*, *HOXD1*) (Fig. 2a, 2b, Extended Data Fig. 3b).  
144 Oscillatory expression of *HOXD1* was previously shown during somitogenesis in  
145 mouse<sup>19</sup> suggesting that its expression pattern and biological function might be conserved  
146 in human PSM. We could also identify oscillation of putative modulators of the  
147 cytoskeleton (*ARHGAP24*, *ARHGEF2*, *RHOA*, *PLEKHG2*) as well as histone modifiers  
148 (*KDM6B*, *JADE1*) as oscillating genes (Fig. 2a, 2c, Extended Data Fig. 3b). The  
149 intriguing possibility that above-mentioned cytoskeleton associated oscillating genes  
150 might represent a link between the segmentation clock and the actual process of  
151 segmentation, characterized by mesenchymal to epithelial transition and associated with  
152 major cytoskeletal rearrangements, remains to be elucidated. Furthermore, identification  
153 of oscillating histone modifiers in the PSM, suggests a possible role of epigenetic  
154 modifications in the regulation or maintenance of the segmentation clock, and will be the  
155 topic of future research efforts.

156 Among the identified oscillatory genes, two thirds were oscillating in phase with  
157 *HES7* (142) and about one third (77) showing an anti-phase oscillatory expression pattern  
158 (Fig. 2a, Extended Data Table 2). The phase cluster of human oscillating genes contained  
159 Notch-pathway associated genes such as *LFNG*<sup>20</sup>, while the anti-phase cluster contained  
160 Wnt-pathway associated negative feedback regulators such as *DKK1* and *SP5*<sup>21,22</sup> (Fig.  
161 2a, 2c), as previously reported for posterior PSM of mouse embryos<sup>23</sup>. Generating a dual  
162 luciferase-activity based reporter line for *DKK1* and *HES7* promoter activities we  
163 confirmed clear phase and anti-phase reporter oscillations in human iPSC-derived PSM  
164 samples (Fig. 2d), suggesting that our induced PSM may represent posterior immature  
165 PSM rather than anterior mature PSM.

166 In order to also show the utility of our system to model anomalies during human  
167 axial skeletogenesis such as SCD or STD, known to be caused by mutations in genes  
168 associated with the segmentation clock (e.g. *HES7*, *LFNG*, *DLL3* and *MESP2*)<sup>24</sup>, we  
169 utilized CRISPR/Cas9-mediated genome editing technology to generate knock-out  
170 reporter iPSC lines aiming to induce frameshifts or deletion mutations in these target  
171 genes in the *HES7* luciferase reporter line background (Extended Data Fig. 4) and  
172 analyzed their putative loss-of-function effect on oscillatory *HES7*-reporter activity.  
173 Knock-out of endogenous *HES7* itself led to complete loss of oscillatory activity of the



174 HES7-reporter, in a 2D-oscillation assay (Fig. 3a), similar to previous embryological  
175 studies utilizing knock-out mice<sup>25</sup>. Interestingly knock-out reporter lines for *LFNG*, *DLL3*  
176 or *MESP2* continued to show strong oscillatory *HES7* activity (Fig. 3b) even though  
177 knock-out mice for *LFNG* and *DLL3* were reported to show defective oscillation  
178 patterns<sup>20,26</sup>. We reasoned that in this 2D-oscillation assay the phase (i.e. timing) of  
179 oscillations is initially reset by medium change, showing collective oscillation even in the  
180 absence of a strong synchronization mechanism. We then examined the synchronization  
181 ability of knock-out reporter lines of aforementioned genes using 3D-spheres of PSM  
182 (Fig. 3c). The control (healthy/wild-type) and the knock-out reporter line for *MESP2*  
183 showed sustained oscillations and occasional traveling waves (Extended Data Movie 3),  
184 indicating intact synchronization among neighboring cells. In the knock-out lines of  
185 *LFNG* or *DLL3*, by contrast, oscillation damped quickly and clear traveling waves were  
186 not observed (Extended Data Movie 3, Fig. 3c, 3d, Extended Data Fig. 5a). We  
187 interpreted the observed quick loss of oscillatory activity as a sign of diminished  
188 synchronization. Unlike the 2D-oscillation assay, spheres spread dynamically on the  
189 culture dish in the 3D-synchronization assay, and cell movement desynchronizes the  
190 oscillation phases. Without proper synchronization mechanism collective oscillation is  
191 quickly lost even though oscillations in individual cells continue. Thus, our assay systems  
192 using induced human PSM can detect defects in both oscillation and synchronization.

193 Flow cytometric evaluation as well as RNA-seq based transcriptome analysis  
194 showed no major differences between control cells and aforementioned reporter lines  
195 (Extended Data Fig. 5b, 5c). PSM induction efficiency was high and comparable to wild-  
196 type (healthy donor) cells in *DLL3*, *LFNG* and *MESP2* knock-out reporter lines, while  
197 slightly reduced for *HES7* knock-out iPSC lines (Extended Data Fig. 5b). Few differences  
198 in gene expression at the iPSC and PSM stages were observed when comparing knock-  
199 out lines with the original healthy donor line, with *HES7*, *MESP2* and *LFNG* showing  
200 higher expression in *HES7* knock-out derived PSM, as previously also shown in mice<sup>27</sup>  
201 (Extended Data Fig. 5c).

202 Taken together, these results underline the overall value of an higher order assay  
203 system that can assess not only gene or protein expression but also more complex  
204 features such as oscillation or synchronization in human PSM, thus opening up the path  
205 to work out functionally relevant and possibly disease-associated features specific to each  
206 loss- or gain-of-function mutation, otherwise not accessible.

207 To further evaluate the utility of our experimental model system to assess not only  
208 key features of the human segmentation clock and somitogenesis but also address  
209 causative molecular mechanisms associated with diseases affecting axial skeletogenesis,  
210 we established iPSC lines from 12 individuals afflicted by SCD or STD (data not shown).  
211 In one of the established STD patient-derived iPSC lines (Extended Data Fig. 6) we  
212 identified via Exome sequencing compound heterozygous loss-of-function mutations in  
213 *MESP2* (rs1452984345: c.256delGCCA, p.fsTer118; rs71647808: c.307T, p.E103X)  
214 (Fig. 4a). Induction of PSM from these patient iPSCs (STD-A and STD-F; two different  
215 iPSC clones from the same patient) appeared to be not affected, as assessed by flow  
216 cytometric analysis of *DLL1* expression (Fig. 4b; Extended Data Fig. 7a). We observed  
217 for the patient line (STD-A) harboring *MESP2* loss-of-function mutations, clear  
218 oscillatory activity of *HES7* in 2D-oscillation assay (Fig. 4c), similar to what we saw for  
219 our human *MESP2* knock-out reporter lines (Fig. 3b). In the 3D-synchronization assay

220 this patient line also showed sustained collective oscillation and occasional traveling  
221 waves, indicating an intact synchronization mechanism (Fig. 4d), again similar to results  
222 seen for *MESP2* knock-out lines (Fig. 3c). In order to facilitate the molecular and  
223 functional analysis of our patient lines, we generated isogenic controls by correcting the  
224 underlying putative disease causing mutations via gene targeting with CRISPR/Cas9.  
225 Allele-specific gene correction of *MESP2* was achieved using sgRNAs targeting either  
226 the c.256delGCCA or c.307T mutation and homologous recombination with donor  
227 vectors bearing normal *MESP2* gene sequence. Microhomology-assisted excision  
228 (MhAX) was used to remove the selection cassette<sup>28</sup> (Fig. 4e, 4f, Extended Data Fig. 8),  
229 thus effectively rescuing the disease-causing loss of *MESP2*, albeit heterozygously.  
230 Gene-edited iPSCs were confirmed to be karyotypically similar to the parental patient  
231 iPSC line (Extended Data Fig. 9). As no clear oscillation or synchronization phenotype  
232 could be observed for the analyzed patient line, we asked whether we could see possible  
233 differences at the functional or molecular level by comparing patient (STD-A and STD-  
234 F) and corresponding rescued iPSC lines (STD-resA and STD-resF). To this end we  
235 induced and compared all stages of our *in vitro* induction and differentiation protocol via  
236 RNA-seq analysis using patient and rescue lines (Fig. 4g, Extended Data Fig. 7b).

237 Comparison of patient clones with wild-type (healthy) and heterozygously  
238 corrected lines revealed the presence of an up-regulated gene cluster at the somitic  
239 mesoderm stage in the analyzed patient lines, which could be reversed upon correction of  
240 either mutated allele (Fig. 4g). Genes apparently up-regulated in patient somitic  
241 mesoderm and reduced upon rescue of either *MESP2* mutation, included *FGF4*, *FGF18*  
242 and *DUSP5* (Fig. 4g, 4h), indicating abnormal Fgf signaling as a possible novel disease  
243 associated molecular feature in STD. *MESP2* knock-out iPSC-derived somitic mesoderm  
244 samples also showed higher levels of expression of *FGF4*, *FGF18* and *DUSP5* (Fig. 4h).  
245 Interestingly human *EPHA3*, which was previously reported to have a dominant negative  
246 effect on somite formation and axial organization in fish<sup>29</sup>, was also found to be up-  
247 regulated in STD-patient and *MESP2*-knock-out derived somitic mesoderm (Fig. 4g, 4h).  
248 Knock-out and patient-lines showed further higher levels of expression for *MESP1* and  
249 *MESP2* as compared to the levels found in healthy or genetically corrected control  
250 samples, indicating possible disrupted negative feed-back regulation by human *MESP2*.  
251 *UNCX*, a gene associated with rostro-caudal patterning of forming somites and found to  
252 be up-regulated during abnormal somitogenesis in *MESP2* knock-out mice<sup>30</sup> was also  
253 found to be highly expressed in *MESP2* patient iPSC-derived somitic mesoderm samples  
254 as compared to genetically rescued controls. Interestingly, several other genes associated  
255 with patterning during somitogenesis and for which genetic mutations in SCD patients  
256 were recently reported, including *LFNG*, *RIPPLY2* and *DMRT2*<sup>24</sup> were also up-regulated  
257 in somitic mesoderm samples derived from STD patient lines (STD-A and STD-F)  
258 harboring *MESP2* loss-of-function mutations (Fig. 4g, 4h, Extended Data Fig. 7c),  
259 indicating reciprocal regulatory mechanisms, possibly connecting these disease  
260 associated genes at the molecular and functional level during the pathogenesis of axial  
261 skeletogenic abnormalities including SCD and STD.

262 In summary, we have shown for the first time phase- and anti-phase oscillation  
263 and traveling wave-like gene expression of key segmentation clock genes in human PSM,  
264 and identified a putative molecular network of known and novel members comprising the  
265 mammalian segmentation clock. We furthermore assessed the function of several disease-

266 associated members of the human segmentation clock, applying our experimental model  
267 system in combination with patient-like or patient-derived iPSCs, thus effectively  
268 creating the first human PSC-based model for congenital scoliosis, which may contribute  
269 to decipher the molecular mechanisms underlying normal and pathological human axial  
270 skeletogenesis.

271 Furthermore, being able to induce iPSCs from non-human model systems  
272 including evolutionary distant species, may, in combination with our proposed  
273 experimental model system, also pave the way for interspecies comparisons of  
274 segmentation clocks, and address as yet elusive molecular and evolutionary biological  
275 questions, such as the presence or absence of an evolutionary conserved core network of  
276 segmentation clock genes. Having access to a robust experimental model system that can  
277 be easily manipulated without the need for transgenic animals or primary tissues, while  
278 allowing assessment of not only genetic but also environmental or epigenetic factors, will  
279 undoubtedly facilitate our molecular and functional understanding of proper as well as  
280 abnormal human somitogenesis and axial skeletal development.

281

## 282 REFERENCES

- 283 1 McCauley, H. A. & Wells, J. M. Pluripotent stem cell-derived organoids: using principles  
284 of developmental biology to grow human tissues in a dish. *Development* **144**, 958-962,  
285 doi:10.1242/dev.140731 (2017).
- 286 2 Chal, J. *et al.* Differentiation of pluripotent stem cells to muscle fiber to model Duchenne  
287 muscular dystrophy. *Nat Biotechnol* **33**, 962-969, doi:10.1038/nbt.3297 (2015).
- 288 3 Lee, J. H., Protze, S. I., Laksman, Z., Backx, P. H. & Keller, G. M. Human Pluripotent  
289 Stem Cell-Derived Atrial and Ventricular Cardiomyocytes Develop from Distinct  
290 Mesoderm Populations. *Cell Stem Cell* **21**, 179-194 e174,  
291 doi:10.1016/j.stem.2017.07.003 (2017).
- 292 4 Loh, K. M. *et al.* Mapping the Pairwise Choices Leading from Pluripotency to Human  
293 Bone, Heart, and Other Mesoderm Cell Types. *Cell* **166**, 451-467,  
294 doi:10.1016/j.cell.2016.06.011 (2016).
- 295 5 Xi, H. *et al.* In Vivo Human Somitogenesis Guides Somite Development from hPSCs.  
296 *Cell Rep* **18**, 1573-1585, doi:10.1016/j.celrep.2017.01.040 (2017).
- 297 6 Pourquie, O. Vertebrate somitogenesis. *Annu Rev Cell Dev Biol* **17**, 311-350,  
298 doi:10.1146/annurev.cellbio.17.1.311 (2001).
- 299 7 Hofmann, M. *et al.* WNT signaling, in synergy with T/TBX6, controls Notch signaling  
300 by regulating Dll1 expression in the presomitic mesoderm of mouse embryos. *Genes Dev*  
301 **18**, 2712-2717, doi:10.1101/gad.1248604 (2004).
- 302 8 Bessho, Y. *et al.* Dynamic expression and essential functions of Hes7 in somite  
303 segmentation. *Genes Dev* **15**, 2642-2647, doi:10.1101/gad.930601 (2001).
- 304 9 Turnpenny, P. D. *et al.* Abnormal vertebral segmentation and the notch signaling  
305 pathway in man. *Dev Dyn* **236**, 1456-1474, doi:10.1002/dvdy.21182 (2007).
- 306 10 Hubaud, A. & Pourquie, O. Signalling dynamics in vertebrate segmentation. *Nat Rev Mol*  
307 *Cell Biol* **15**, 709-721, doi:10.1038/nrm3891 (2014).
- 308 11 Lauschke, V. M., Tsiairis, C. D., Francois, P. & Aulehla, A. Scaling of embryonic  
309 patterning based on phase-gradient encoding. *Nature* **493**, 101-105,  
310 doi:10.1038/nature11804 (2013).
- 311 12 Matsumiya, M., Tomita, T., Yoshioka-Kobayashi, K., Isomura, A. & Kageyama, R. ES  
312 cell-derived presomitic mesoderm-like tissues for analysis of synchronized oscillations in  
313 the segmentation clock. *Development* **145**, doi:10.1242/dev.156836 (2018).

- 314 13 Wahl, M. B., Deng, C., Lewandoski, M. & Pourquie, O. FGF signaling acts upstream of  
315 the NOTCH and WNT signaling pathways to control segmentation clock oscillations in  
316 mouse somitogenesis. *Development* **134**, 4033-4041, doi:10.1242/dev.009167 (2007).
- 317 14 Burgess, R., Rawls, A., Brown, D., Bradley, A. & Olson, E. N. Requirement of the  
318 paraxis gene for somite formation and musculoskeletal patterning. *Nature* **384**, 570-573,  
319 doi:10.1038/384570a0 (1996).
- 320 15 Fleming, A., Kishida, M. G., Kimmel, C. B. & Keynes, R. J. Building the backbone: the  
321 development and evolution of vertebral patterning. *Development* **142**, 1733-1744,  
322 doi:10.1242/dev.118950 (2015).
- 323 16 Krol, A. J. *et al.* Evolutionary plasticity of segmentation clock networks. *Development*  
324 **138**, 2783-2792, doi:10.1242/dev.063834 (2011).
- 325 17 Dequeant, M. L. *et al.* A complex oscillating network of signaling genes underlies the  
326 mouse segmentation clock. *Science* **314**, 1595-1598, doi:10.1126/science.1133141  
327 (2006).
- 328 18 Hubaud, A., Regev, I., Mahadevan, L. & Pourquie, O. Excitable Dynamics and Yap-  
329 Dependent Mechanical Cues Drive the Segmentation Clock. *Cell* **171**, 668-682 e611,  
330 doi:10.1016/j.cell.2017.08.043 (2017).
- 331 19 Zakany, J., Kmita, M., Alarcon, P., de la Pompa, J. L. & Duboule, D. Localized and  
332 transient transcription of Hox genes suggests a link between patterning and the  
333 segmentation clock. *Cell* **106**, 207-217 (2001).
- 334 20 Okubo, Y. *et al.* Lfng regulates the synchronized oscillation of the mouse segmentation  
335 clock via trans-repression of Notch signalling. *Nat Commun* **3**, 1141,  
336 doi:10.1038/ncomms2133 (2012).
- 337 21 Huggins, I. J. *et al.* The WNT target SP5 negatively regulates WNT transcriptional  
338 programs in human pluripotent stem cells. *Nat Commun* **8**, 1034, doi:10.1038/s41467-  
339 017-01203-1 (2017).
- 340 22 Pedersen, L., Jensen, M. H. & Krishna, S. Dickkopf1--a new player in modelling the Wnt  
341 pathway. *PLoS One* **6**, e25550, doi:10.1371/journal.pone.0025550 (2011).
- 342 23 Sonnen, K. F. *et al.* Modulation of Phase Shift between Wnt and Notch Signaling  
343 Oscillations Controls Mesoderm Segmentation. *Cell* **172**, 1079-1090 e1012,  
344 doi:10.1016/j.cell.2018.01.026 (2018).
- 345 24 Bouman, A. *et al.* Homozygous DMRT2 variant associates with severe rib malformations  
346 in a newborn. *Am J Med Genet A* **176**, 1216-1221, doi:10.1002/ajmg.a.38668 (2018).
- 347 25 Kageyama, R., Niwa, Y. & Shimojo, H. Rhythmic gene expression in somite formation  
348 and neural development. *Mol Cells* **27**, 497-502, doi:10.1007/s10059-009-0068-1 (2009).
- 349 26 Takahashi, Y., Inoue, T., Gossler, A. & Saga, Y. Feedback loops comprising Dll1, Dll3  
350 and Mesp2, and differential involvement of Psen1 are essential for rostrocaudal  
351 patterning of somites. *Development* **130**, 4259-4268 (2003).
- 352 27 Chen, J., Kang, L. & Zhang, N. Negative feedback loop formed by Lunatic fringe and  
353 Hes7 controls their oscillatory expression during somitogenesis. *Genesis* **43**, 196-204,  
354 doi:10.1002/gene.20171 (2005).
- 355 28 Kim, S. I. *et al.* Microhomology-assisted scarless genome editing in human iPSCs. *Nat*  
356 *Commun* **9**, 939, doi:10.1038/s41467-018-03044-y (2018).
- 357 29 Lackmann, M. *et al.* Distinct subdomains of the EphA3 receptor mediate ligand binding  
358 and receptor dimerization. *J Biol Chem* **273**, 20228-20237 (1998).
- 359 30 Takahashi, Y. *et al.* Transcription factors Mesp2 and Paraxis have critical roles in axial  
360 musculoskeletal formation. *Dev Dyn* **236**, 1484-1494, doi:10.1002/dvdy.21178 (2007).
- 361



362 **ACKNOWLEDGEMENTS**

363 The authors would like to thank Brendan McIntyre and Paul O'Neill for critical reading  
364 of the manuscript; Kanae Mitsunaga for help with FACS analysis; Yuhei Ashida for help  
365 with development of 3D-synchronization assay; Junya Asahira for help with RNA-seq  
366 experiments; Akihiro Yamashita for help with 3D-CI experiments; Mitsuaki Shibata and  
367 Taiki Nakajima for help with development of one-step PSM induction protocol; Noriaki  
368 Kawakami for help with general information on SCD; Monika Ohno and Sayaka  
369 Nishimura for help with iPSC quality control and validation; the CiRA Genome  
370 Evaluation Group, in particular Hiromi Dohi, Fumiyo Kitaoka, Masaki Nomura, Tomoko  
371 Takahashi, Masafumi Umekage, and Naoko Takasu for performing SNP array analysis.  
372 This work was supported by the CiRA Fellowship Program of Challenge to C.A.; Naito  
373 Foundation Scientific Research Grant to C.A.; Grant-in-Aid for Challenging Exploratory  
374 Research (KAKENHI Number 16K15664) to C.A.; Grant-in-Aid for Scientific Research  
375 on Innovative Areas (KAKENHI Number 17H05777) to M.M.; Takeda Science  
376 Foundation Grant to M.E.; Japan Agency for Medical Research and Development  
377 (AMED) Grants Number 12103610 and 17935423 to M.K.S. for iPSC generation and  
378 qualification; the Core Center for iPS Cell Research and the Acceleration Program for  
379 Intractable Disease Research Utilizing Disease Specific iPS Cells (AMED) to J.T.; the  
380 Cooperative Research Program (Joint Usage/Research Center Program) of Institute for  
381 Frontier Life and Medical Sciences, Kyoto University to J.T., L.G and S.I..

382

383 **AUTHOR CONTRIBUTIONS**

384 C.A. conceived the study; C.A. and M.E. designed the project and supervised it; M.M.  
385 developed and performed 2D-oscillation assay and 3D-synchronization assay; Y.Y., M.U.  
386 and C.A. developed induction and differentiation protocols and performed majority of  
387 remaining *in vitro* and *in vivo* experiments; S.K. supported microscopy and calcium  
388 imaging; M.Ni. helped with xeno-transplantation experiments; M.O., M.K.S. and A.N.  
389 established patient iPSC lines used in this study and performed quality control of iPSCs;  
390 M.O. helped with FACS data analysis; L.G. and S.I. performed exome sequencing and  
391 database analysis; T.Y. analyzed RNA-seq and qRT-PCR-data; S.S. helped with RNA-  
392 seq analysis; K.W. designed gene knockout and editing strategies; T.M. performed gene  
393 editing and genotyping of patient iPSCs; M.Na. performed genotyping of patient and  
394 gene-edited iPSCs; Y.Y., M.U. and C.A. generated knock-out lines with the help of  
395 M.Na., K.W. and performed molecular/functional assays using knock-out lines, patient  
396 iPSCs and corrected controls; M.I. developed one-step PSM induction protocol; M.K.S.  
397 and H.Y. shared reagents; J.T. helped with establishment of patient lines and provided  
398 administrative support; C.A. analyzed and interpreted the data and wrote the paper with  
399 the support of M.E. and K.W..

400

401 **AUTHOR INFORMATION**

402 The authors declare no competing interests. Correspondence and request for materials  
403 should be addressed to M.E. ([miki.ebisuya@riken.jp](mailto:miki.ebisuya@riken.jp)) or C.A. ([alev@cira.kyoto-u.ac.jp](mailto:alev@cira.kyoto-u.ac.jp)).

404



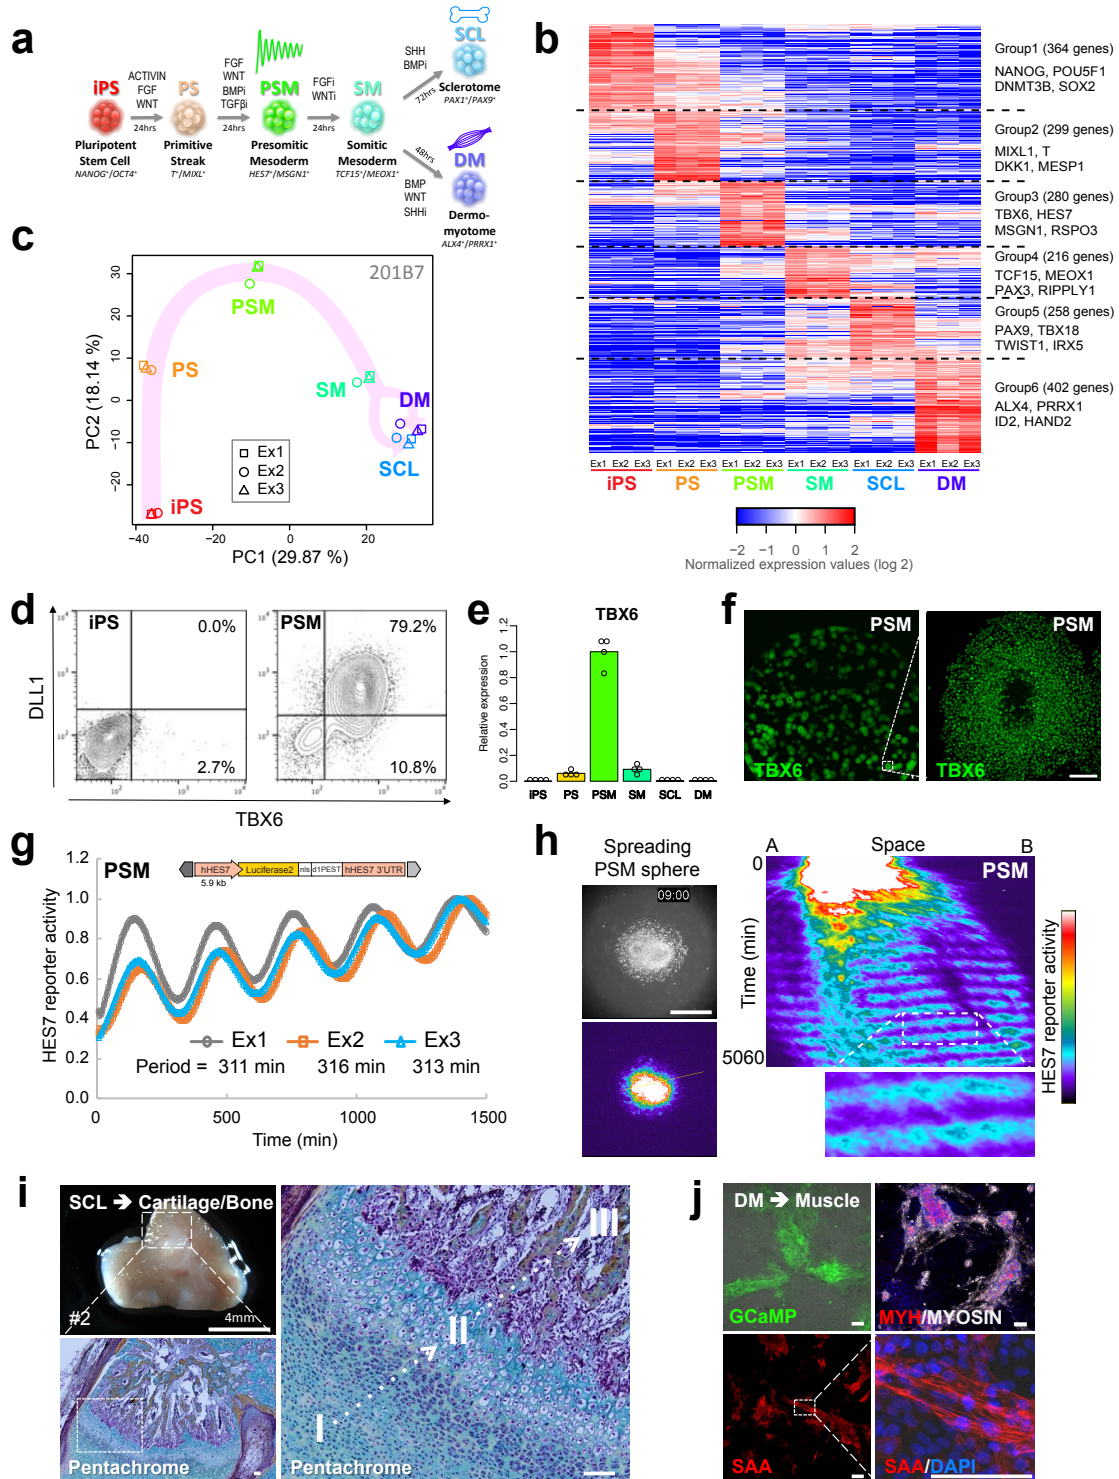

406  
407  
408  
409  
410

**Fig. 1 | Molecular and functional analysis of human PSC-derived presomitic mesoderm (PSM) and its derivatives. a**, Schematic overview of step-wise induction and differentiation of human PSM mimicking embryonic development via activation or inhibition of appropriate signaling pathways. **b**, Heatmap of gene expression levels of

411 step-wise induced PSM and derivatives. FPKM values of each gene were normalized to  
412 mean of all samples. Results shown for samples derived from iPSC-line 201B7. See  
413 Extended Data Fig. 1 for data obtained for other iPSC-line (1231A3) and Extended Data  
414 Table 1 for complete list of identified genes. **c**, PCA analysis of transcript levels at  
415 different stages of applied protocol (for 201B7-derived samples). **d**, Protein expression of  
416 DLL1 and TBX6 in human iPSCs and iPSC-derived PSM (201B7). **e**, Expression of  
417 *TBX6* transcript during different stages of human PSM induction and differentiation  
418 (qRT-PCR results for four independent experiments using 201B7 are shown). **f**,  
419 Expression of TBX6 protein in human PSM. Left panel shows TBX6 staining of entire  
420 well. Enlarged view of highlighted area is shown on right side of panel. Scale bar: 100  
421  $\mu\text{m}$ . **g**, Oscillation of HES7-reporter activity in induced PSM. The signal was normalized  
422 to the maximum oscillation peak. The period was calculated as the average elapsed time  
423 between the peaks. Data of three independent experiments are shown. Schematic  
424 depiction of utilized reporter construct shown on top. **h**, Synchronization of HES7-  
425 reporter activity in spreading PSM sphere. Left: A PSM sphere was induced in 3D  
426 culture, before attaching to dish. Right: A kymograph along the yellow line in the left  
427 panel. Normalization (1500, 9000). Scale bar: 500  $\mu\text{m}$ . Representative images of three  
428 independent experiments are shown. See also Extended Data Movie 1. **i**, Representative  
429 whole mount (upper panel) and histological staining of section (lower panel) of human  
430 sclerotome (SCL)-derived *in vivo* cartilage and bone. Pentachrome staining of marked  
431 area reminiscent of *in vivo* human endochondral bone formation. I: proliferative human  
432 cartilage, II: hypertrophic cartilage, III: ossifying cartilage and forming human bone.  
433 Scale bar: 100  $\mu\text{m}$ . See also Extended Data Fig. 2e. **j**, Skeletal muscle derivation from  
434 step-wise induced human dermomyotome (DM). Left upper side of panel: GCaMP  
435 positive beating colonies of induced skeletal muscle. Left lower and right side of panel:  
436 Staining of *in vitro* induced human skeletal muscle with myosin heavy chain (MYH) and  
437 myosin (upper panel) or sarcomeric alpha-actinin (SAA) (lower half of panel). Scale bar:  
438 100  $\mu\text{m}$ . See also Extended Data Fig. 2f and Extended Data Movie 2.  
439

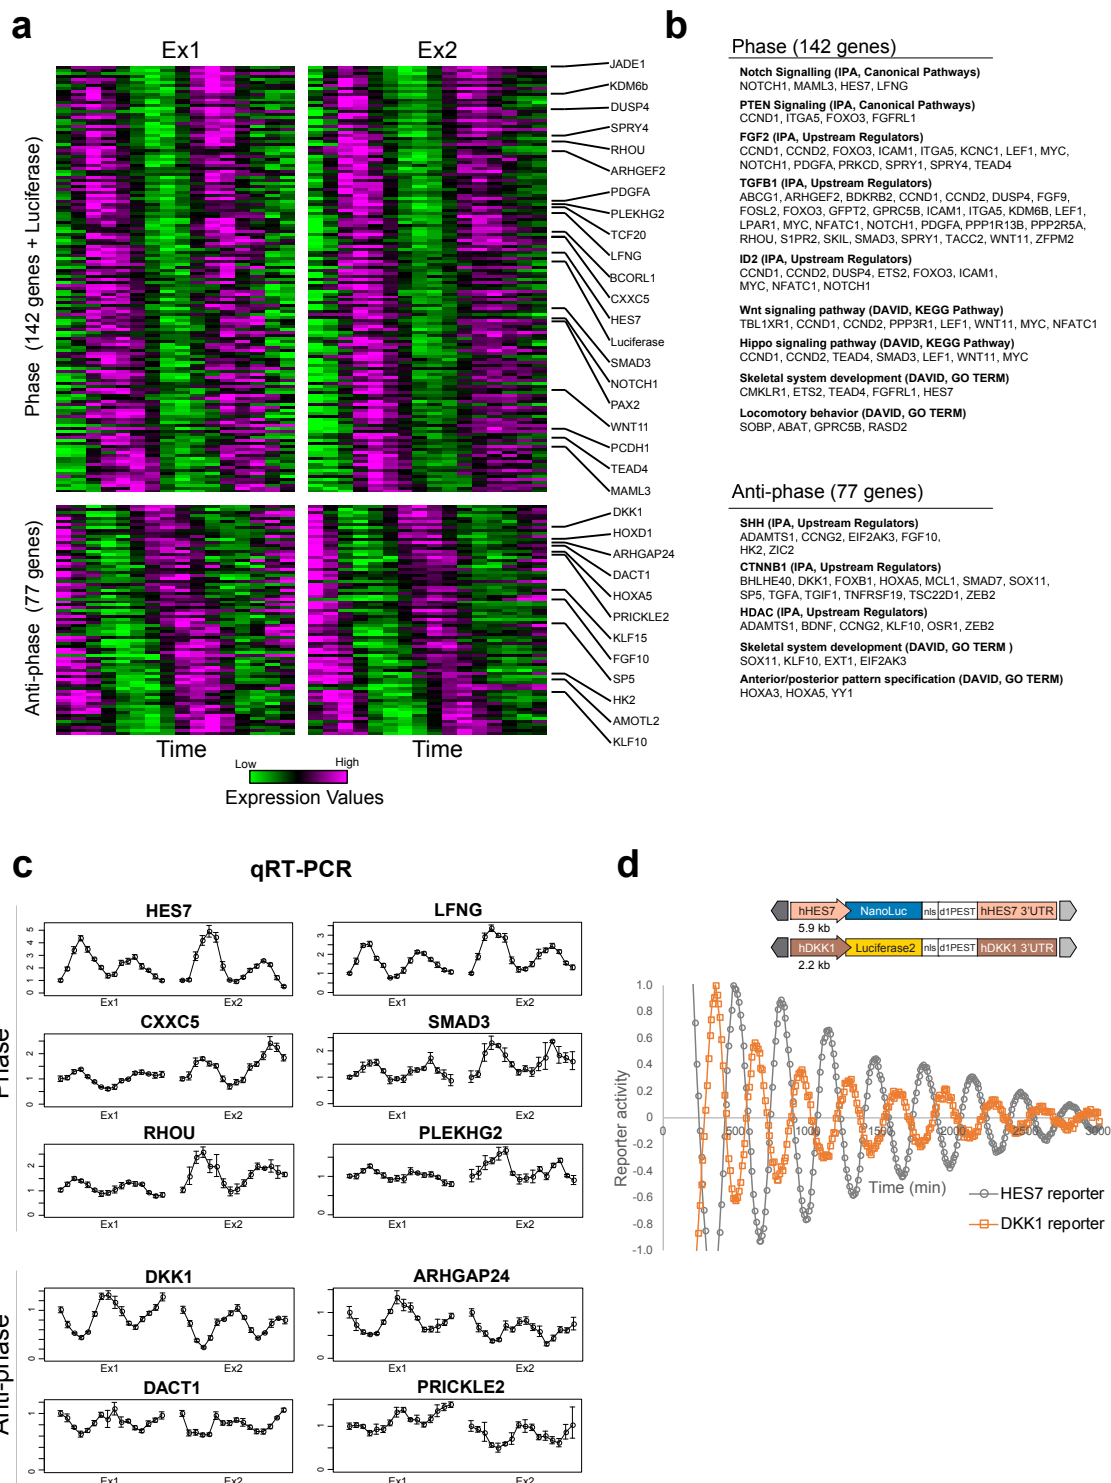

440  
441  
442  
443  
444  
445

**Fig. 2 | Identification of phase and anti-phase oscillating genes of the human segmentation clock.** **a**, Heatmap of normalized gene expression levels for oscillating genes in human PSM. RNA-sequencing results for two independent data sets, with 16 samples each. Examples of identified phase and anti-phase oscillating genes are highlighted on right side of panel. See also Extended Data Table 2 for complete list of

446 identified oscillating genes. **b**, Pathway analysis result of phase and anti-phase oscillating  
447 genes. See also Extended Data Table 3 for complete results of pathway and GO analyses.  
448 **c**, Validation of RNA-sequencing results via qRT-PCR for selected phase and anti-phase  
449 oscillating genes. Error bars indicate S.D. of three technical replicas for each time point  
450 and sample set. **d**, Results obtained for dual luciferase reporter assay of HES7-reporter  
451 (NanoLuc) and DKK1-reporter (Luciferase2) shown in lower half of panel. The one-step  
452 induction protocol was used. The signal was detrended ( $\pm 2$  hours) and normalized to the  
453 maximum oscillation peak. Representative graph of three independent experiments is  
454 shown. Schematic overview of used reporter constructs are shown on top.  
455

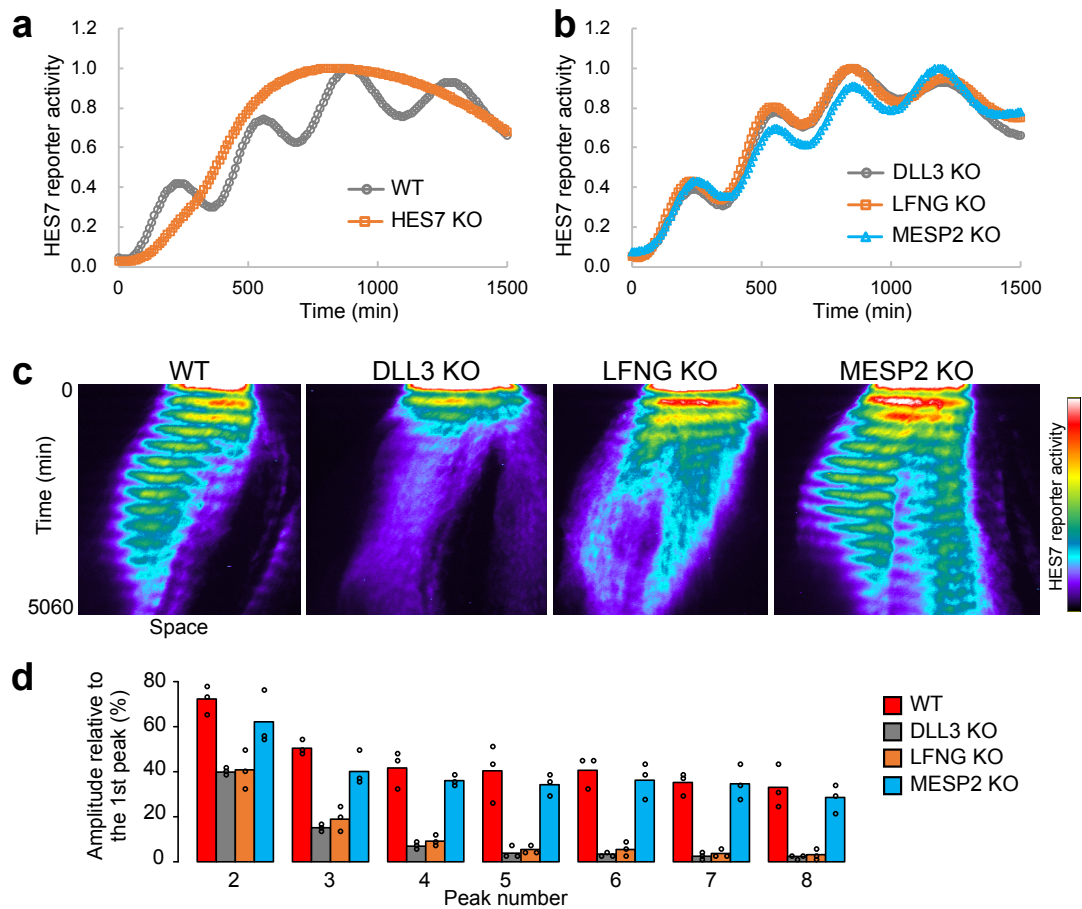

456  
457  
458  
459  
460  
461  
462  
463  
464  
465

**Fig. 3 | Molecular and functional evaluation of targeted disruption of selected segmentation clock genes in human PSM.** **a**, 2D-oscillation assay for wild-type (WT) and *HES7*-knock-out PSMs. The signal was normalized to the maximum oscillation peak. **b**, 2D-oscillation assay for *LFNG*-, *DLL3*- and *MESP2*-knock-out PSMs. **c**, 3D-synchronization assay for knock-out PSMs. A kymograph along the yellow line in Extended Data Movie 3 is shown. Normalization (1500, 35000). Representative graphs and images of three independent experiments are shown. **d**, Damping rate of oscillation amplitude in knock-out PSMs. The signal value of each oscillation peak is shown. Data of three independent experiments are shown. See also Extended Data Fig. 5a.



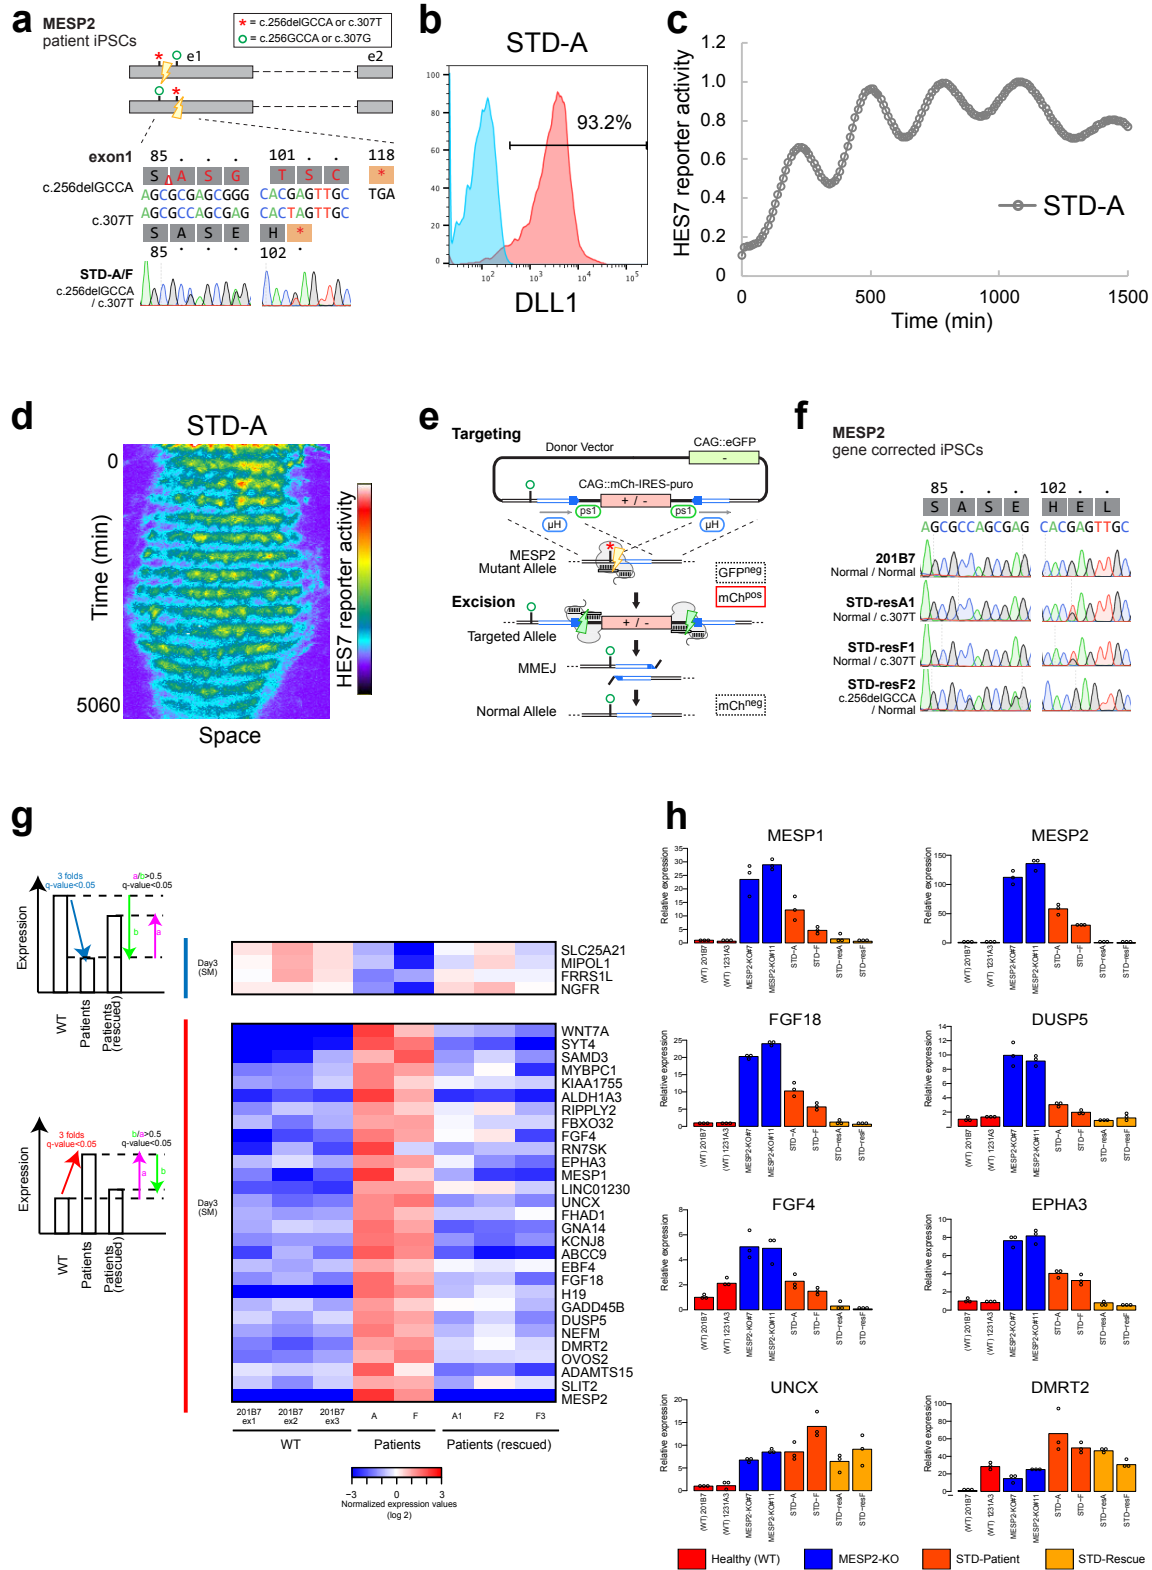

466  
 467  
 468  
 469  
 470

**Fig. 4 | *In vitro* recapitulation and molecular analysis of disease-phenotype using spondylothoracic dysostosis (STD) patient iPSCs and genetically corrected controls.**  
**a**, Compound heterozygous genotype of STD-A/F patient iPSCs. **b**, Evaluation of DLL1 positive PSM induction efficiency of STD-A patient iPSCs. Representative results of

471 DLL1 protein expression in STD-A derived PSM, n=3. See also Extended Data Fig. 7a  
472 for representative results of comparison (n=3) between patient (STD-A/F) and rescue  
473 clones (STD-resA/resF). **c**, 2D-oscillation assay for STD-A PSM. The signal was  
474 normalized to the maximum oscillation peak. Representative graph of three independent  
475 experiments is shown. **d**, 3D-synchronization assay for STD-A PSM. Normalization  
476 (1500, 4000). Representative image of three independent experiments is shown. **e**,  
477 Schematic of the gene targeting procedure for allele-specific correction of *MESP2*  
478 mutations using MhAX. Details for the targeting and genotyping procedures are provided  
479 in Extended Data Fig. 8. **f**, Genotype of heterozygously corrected iPSC subclones. 201B7  
480 is included as a reference. **g**, Heatmap of gene expression levels for STD-related genes.  
481 The genes were upregulated or downregulated in the STD-A and STD-F patient lines and  
482 increases or decreases were inhibited in rescued cell lines. See also Extended Data Fig.  
483 7b. **h**, qRT-PCR-based validation of RNA-sequencing results. Data of three independent  
484 experiments are shown. See also Extended Data Fig. 7c for qRT-PCR-based validation of  
485 additional candidates.

486 **METHODS**

487

488 **Pluripotent stem cell generation and culture**

489 Experiments were performed using mainly two human induced pluripotent stem (iPS)  
490 cell lines derived from healthy donors, 1231A3<sup>31</sup> and 201B7<sup>32</sup>. Pluripotent stem cells of  
491 patients suffering from *spondylocostal dysostosis* (SCD) or *spondylothoracic dysostosis*  
492 (STD) were induced using patient-derived primary cell samples. The following cell line  
493 of a STD patient was obtained from the NIGMS Human Genetic Cell Repository at the  
494 Coriell Institute for Medical Research: GM13539. Reprogramming was performed with  
495 episomes (pCE-hOCT3/4, pCE-hSK, pCE-hUL, pCE-mp53DD, pCXB-EBNA1) under  
496 feeder-free conditions using StemFit<sup>®</sup> medium and laminin-coated dishes (iMatrix511)<sup>31</sup>.  
497 Human iPSCs were maintained without feeder cells and cultured on iMatrix-511 silk  
498 (Nippi) coated dishes or plates with StemFit<sup>®</sup> AK02N (Ajinomoto) medium  
499 supplemented with 50 U penicillin and 50 mg/ml streptomycin (Gibco).

500

501 **Step-wise induction of human somitic mesoderm**

502 Human iPSCs were seeded on iMatrix-511 silk-coated plates or dishes at appropriate  
503 densities as single cells (e.g.  $1.3 \times 10^4$  cells/well into 6 well plate;  $8.0 \times 10^4$  cells/dish  
504 into 10 cm dish) 5 days before induction. All differentiation and induction steps were  
505 performed in chemically defined medium with insulin (CDMi)<sup>33</sup> if not otherwise  
506 mentioned. Our step-wise protocol is similar to a recently published mesoderm induction  
507 protocol<sup>4</sup>, albeit with some differences. Human primitive streak (PS) cells were induced  
508 by treatment of iPSCs with bFGF (20 ng/ml), CHIR99021 (10  $\mu$ M) and Activin A (50  
509 ng/ml) for 24 hours. Presomitic mesoderm (PSM) cells were induced from PS cells by  
510 exposure to SB431542 (10  $\mu$ M), CHIR99021 (3  $\mu$ M), LDN193189 (250 nM) and bFGF  
511 (20 ng/ml) for 24 hours. Subsequently, somitic mesoderm (SM) cells were induced from  
512 PSM cells using PD173074 (100 nM) and XAV939 (1  $\mu$ M) for 24 hours. For details of  
513 used recombinant human proteins and small molecule agonists or inhibitors see Extended  
514 Data Table 4.

515

516 **Human sclerotome and dermomyotome induction**

517 Following initial step-wise somitic mesoderm (SM) induction, human sclerotome (SCL)  
518 cells were induced with combination of SAG (100 nM) and LDN193189 (600 nM)<sup>34</sup> for  
519 72 hours. Dermomyotome (DM) cells were induced from human somitic mesoderm as  
520 previously described<sup>4</sup>, using a combination of CHIR99021 (3  $\mu$ M), GDC0449 (150 nM)  
521 and BMP4 (50 ng/ml) for 48 hours.

522

523 ***In vitro* 3D-chondrogenic induction (3D-CI)**

524 Step-wise induced human sclerotome (SCL) cells were dissociated using Accutase (Life  
525 Tech), centrifuged and resuspended in CDMi before being seeded ( $2.0 \times 10^5$  cells/well)  
526 into 96 well low attachment plates containing sclerotome induction medium with ROCK-  
527 inhibitor Y27632 (Wako), forming 3D aggregates overnight. Initial 3D-SCL spheres were  
528 transferred into low attachment plates or dishes containing 3D-CI medium<sup>35</sup> and cultured  
529 under standard conditions. Medium was changed every three days.

530

531

532 ***In vitro* skeletal muscle induction**

533 Dermomyotome (DM) cells were dissociated using Accutase (Life Tech), centrifuged,  
534 resuspended in CDMi and seeded ( $2.5 \times 10^5$  cells/well) into Matrigel coated 12 well  
535 plates in muscle induction medium containing ROCK-inhibitor Y27632 (Wako). In order  
536 to induce human skeletal muscle cells, we applied the N2 medium established  
537 previously<sup>36</sup> with some modifications (DMEM/F12 (Gibco), 1% ITS (Corning), 1% N2  
538 Supplement (Gibco), 0.2% Penicillin/Streptomycin (Gibco), 1% L-Glutamine (Gibco),  
539 2% Horse serum (Sigma-Aldrich)). Medium was changed every three days. Calcium  
540 imaging of DM-derived skeletal muscle activity in GCaMP reporter line (Gen1C)<sup>37</sup> was  
541 performed using Nikon A1R MP (Multiphoton+N-STORM).  
542

543 ***In vivo* xeno-transplantation of PSM derivatives**

544 NOD/ShiJic-*scid*Jcl mice were purchased from CLEA Japan. Human sclerotome cells  
545 derived from healthy donor (WT) or homozygous/heterozygous luciferase reporter lines  
546 (625-A4 and 625-D4) were dissociated using Accutase (Life Tech) and resuspended in  
547 100  $\mu$ l of CDMi before being mixed with the same volume of Matrigel as previously  
548 described<sup>4</sup>. Numbers of transplanted cells ranged from  $\sim 5.0 \times 10^5 - 1.2 \times 10^6$   
549 cells/injection. Cells were injected into mice subcutaneously with 26 G needle and 1 ml  
550 syringe (Terumo). Forming cartilage and bone tissues were taken out at 2 months post  
551 injection. Bioluminescence images were taken with IVIS Spectrum (PerkinElmer).  
552 Whole mount photos were taken with LEICA M205FA (Leica). Animal experiments  
553 were approved by the institutional animal committee of Kyoto University and performed  
554 in strict accordance with the Regulation on Animal Experimentation at Kyoto University.  
555

556 **Quantitative real-time PCR (qRT-PCR)**

557 RNA was extracted with the RNeasy mini kit (Qiagen) following the manufacturer's  
558 instructions. cDNA was synthesized using Superscript III Reverse Transcriptase  
559 (Invitrogen) from 1  $\mu$ g total RNA. cDNA was diluted 1:10 in RNase-free water. qRT-  
560 PCR was performed using Thunderbird SYBR qPCR Mix (Toyobo) and QuantStudio™  
561 12K Flex Real-Time PCR System (Thermo Fisher). The expression values of target genes  
562 were normalized by b-actin expression from the same cDNA templates. Details of  
563 utilized qRT-PCR primers are listed in Extended Data Table 5.  
564

565 **Immunocytochemistry**

566 Cells were fixed with 2% paraformaldehyde (PFA) for 30 minutes and washed twice with  
567 PBS. Samples were permeabilized with 0.2% Triton® X-100 (Sigma-Aldrich) in PBS for  
568 10 minutes at room temperature and then washed with PBST (1% TWEEN® 20 (Sigma-  
569 Aldrich) in PBS). Subsequently, samples were blocked in 5% skim milk for 1 hour at  
570 room temperature and then stained with primary antibodies for overnight at 4°C. Samples  
571 were then washed with PBST three times and stained with secondary antibodies for 1  
572 hour at room temperature. Antibodies were diluted in 10% blocking solution (5% skim  
573 milk) in PBST, washed with PBST twice and stained with DAPI for nuclear  
574 counterstaining for 5 minutes at room temperature. All images were taken using Nikon  
575 A1R MP (Multiphoton+N-STORM). For details of used primary and secondary  
576 antibodies see Extended Data Table 6.  
577

578 **Histological analysis**

579 Tissues were fixed with 4% PFA overnight at 4°C. Fixed samples were washed with PBS  
580 twice and embedded in paraffin. Sections were sliced at 3 µm for immunostaining and 5  
581 µm for other stainings. Sections were stained with Hematoxylin-Eosin (HE), Safranin O,  
582 von Kossa, Pentachrome, anti-type I Collagen (COL1) antibody, anti-type II Collagen  
583 (COL2) antibody, and anti-Human Nuclear Antigen (HNA) antibody. Sections stained  
584 with antibodies were incubated for overnight at 4°C. Secondary antibodies were applied  
585 with N-Histofine® Simple Stain™ MAX PO (Nichirei Bioscience Inc.) for 30 minutes at  
586 room temperature. Signals were detected by N-Histofine® DAB-3S kit (Nichirei  
587 Bioscience Inc.). Details of used antibodies are listed in Extended Data Table 6.

588

589 **Flow cytometric analysis**

590 Cells were washed with PBS and dissociated using Accutase (Life Technologies) and  
591 centrifuged. Cells were resuspended ( $1.0 \times 10^7$  cells/ml) in FACS buffer (0.1% BSA in  
592 PBS) and stained with allophycocyanin (APC)-conjugated DLL1 antibody for 30 minutes  
593 at 4°C. Then, cells were stained with DAPI to eliminate dead cells after washing with  
594 FACS buffer once and finally strained through a filter mesh. As for the co-staining of  
595 intracellular molecules TBX6 and BRACHYURY with DLL1, cells were fixed with 4%  
596 paraformaldehyde (PFA) for 20 minutes at 4°C after initial staining with DLL1 antibody  
597 and washed twice with staining medium, which contained PBS with 2% fetal bovine  
598 serum (FBS). Samples were permeabilized with BD Perm/Wash buffer (BD Biosciences)  
599 for 15 minutes at room temperature and stained with TBX6 primary antibody or  
600 phycoerythrin (PE)-conjugated BRACHYURY antibody for 60 minutes at room  
601 temperature and washed with BD Perm/Wash buffer twice. The cells stained with TBX6  
602 antibody were stained with Alexa Fluor® 488-conjugated secondary antibody for 60  
603 minutes at room temperature. The samples were washed with BD Perm/Wash buffer  
604 twice and suspended into staining medium. Flow cytometric analysis was performed  
605 using LSR or BD FACSAria II cell sorter (BD Biosciences). FACS data was analyzed  
606 and graphs were generated using FlowJo software (FlowJo LLC). For details of used  
607 antibodies see Extended Data Table 6.

608

609 **Reporter constructs**

610 For the HES7-reporter, human *HES7* promoter (5937 bp) and 3'UTR were fused to  
611 Luciferase2-NLS-d1PEST<sup>38</sup>. For the dual reporter assay, the *HES7* promoter and 3'UTR  
612 were fused to NanoLuc-NLS-d1PEST, while human *DKK1* promoter (2218 bp) and  
613 3'UTR were fused to Luciferase2-NLS-d1PEST. These reporters were integrated into the  
614 genome using *piggyBac* transposition. See Fig. 1g and Fig. 2d for schematic overviews of  
615 used reporter constructs.

616

617 **2D-oscillation assay**

618 Luminescence was measured in the presence of D-luciferin (200 µM) with Kronos Dio  
619 Luminometer (Atto). For the dual reporter assay, HES7- and DKK1-reporter constructs  
620 were simultaneously introduced into the cells, and each luminescence was filtered and  
621 measured in the presence of Furimazine (400 nM) and D-luciferin (1 mM). HES7-  
622 reporter cells were seeded on a 35 mm dish coated with iMatrix-511 at 3000 cells/dish.  
623 After 4 days culture, medium was changed into CDMi containing SB431542 (10 µM),



624 DMH1 (2  $\mu$ M), CHIR99021 (10  $\mu$ M) and bFGF (20 ng/ml). After additional 3 days  
625 culture, the medium was changed into CDMi without inhibitors for measurement with  
626 Kronos Dio Luminometer (Atto). This (modified) one-step protocol<sup>39</sup> was used for Fig.  
627 1g and 2d. All other oscillation measurements were performed using our standard step-  
628 wise PSM induction protocol.

629

### 630 **3D-synchronization assay**

631 To make 3D cell spheres, HES7-reporter iPSCs were seeded into non-adhesive round  
632 bottom 96 well plates at 1000-3000 cells/well and cultured in CDMi containing BMP4  
633 (50 ng/ml), CHIR99021 (10  $\mu$ M) and Y27632 (10  $\mu$ M). After one day of culture, Y27632  
634 was removed. After 18 hours culture the medium was changed into CDMi containing  
635 DMH1 (2  $\mu$ M) and CHIR99021 (10  $\mu$ M). After 6 hours culture, the cell sphere was  
636 transferred to a fibronectin-coated glass bottom dish with CDMi containing DMH1 (2  
637  $\mu$ M) and D-luciferin (1 mM), and luminescence was imaged with a customized incubator  
638 microscope LCV110 (Olympus). Obtained Image was analyzed with Metamorph  
639 (Molecular Devices) and Excel (Microsoft), and kymograph was made by averaging  
640 signals over 10 pixels with Metamorph.

641

### 642 **Sampling for RNA-seq analysis of oscillating genes**

643 Our standard step-wise PSM induction protocol was used with the following  
644 modifications. HES7-reporter cells were seeded on a 35 mm dish coated with Matrigel.  
645 At 12 hours during the 2nd-step (PSM induction), the cells were split into multiple 35  
646 mm dishes at  $4.0 \times 10^5$  cells/dish and cultured in CDMi containing SB431542 (10  $\mu$ M),  
647 LDN193189 (250 nM) and CHIR99021 (3  $\mu$ M). After 12 hours culture the medium was  
648 changed into CDMi containing SB431542 (10  $\mu$ M), LDN193189 (250 nM), CHIR99021  
649 (3  $\mu$ M) and bFGF (20 ng/ml). The luminescence was continuously monitored with  
650 Kronos Dio Luminometer with one sample, and the other samples were frozen at each  
651 time point.

652

### 653 **Library preparation for RNA-sequencing**

654 Total RNA was extracted using RNeasy mini kit (Qiagen) following the manufacturer's  
655 instructions. RNA-seq libraries were generated from 200-300 ng total RNA with the  
656 TruSeq Stranded mRNA LT Sample Prep Kit (Illumina, San Diego, CA, USA) according  
657 to the manufacturer's protocol, with the exception of the libraries used for RNAseq  
658 analysis of oscillating genes, which were generated from 120 ng total RNA using  
659 NeoPrep system (Illumina) following the manufacturer's instructions. The obtained RNA-  
660 seq libraries were sequenced on NextSeq 500 (75 bp – 86 bp single-end reads, Illumina).

661

### 662 **RNA-sequencing data analyses**

663 The sequenced reads were mapped to the hg38 human reference genome plus the  
664 luciferase reporter sequence using HISAT2 (version 2.1.0)<sup>40</sup> with the GENCODE v25  
665 annotation gtf file after trimming adaptor sequences and low-quality bases by cutadapt-  
666 1.14<sup>41</sup>. The mapped reads with high mapping quality (MAPQ  $\geq$  20) were used for  
667 further analyses. For identification of the differentiation stage-related genes, the  
668 differentially expressed genes ( $\geq$  5-folds changes and q-values  $\leq$  0.05 between any pair  
669 of samples) were extracted using Cuffdiff<sup>42</sup> within Cufflinks version 2.2.1 package and

670 GENCODE v25 annotation file, and the extracted genes were grouped into six stages  
671 based on the maximum expression levels (FPKM values determined by Cuffdiff) among  
672 the differentiation stages. The low expressed genes ( $\leq 10$  FPKM) across all stages were  
673 filtered out before grouping. For identification of the oscillation genes, the uniquely  
674 mapped reads were counted and normalized to calculate the gene expression levels using  
675 HTSeq (version 0.6.1)<sup>43</sup> with GENCODE v25 annotation gtf file (protein-coding genes)  
676 and edgeR (version 3.18.1)<sup>44</sup> after filtering low expressed genes (cpm  $\leq 1$ ) across all  
677 conditions in each experiment, while rhythmic genes were identified by ARSER (version  
678 2.0)<sup>45</sup> with FDR\_BH  $\leq 0.03$  in both two independent experiments. The filtering genes  
679 for noise judged by ARSER in both experiments were excluded from oscillation genes.  
680 For pathway and Gene Ontology analyses, DAVID web tools<sup>46</sup> and IPA (Qiagen Inc.,  
681 <https://www.qiagenbioinformatics.com/products/ingenuitypathway-analysis>) were used.  
682 For identification of the patient (STD-A/F) related genes, fold changes with q-values  
683 were calculated with HTSeq (version 0.6.1)<sup>43</sup> with GENCODE v25 annotation gtf file  
684 and edgeR (version 3.18.1)<sup>44</sup>. The genes whose expression values were upregulated or  
685 downregulated ( $\geq 3$  folds changes,  $q < 0.05$ , STD lines vs. WT), and increases or  
686 decreases were inhibited ( $\geq 50\%$ ,  $q < 0.05$ ) in the rescued lines, were defined as STD-  
687 related upregulated or downregulated genes, respectively. The genes whose expression  
688 levels were low (average cpm  $\leq 5$ ) both in wild type and STD-lines were filtered out.  
689 For comparisons of expression profiles between knock-out (KO) cell lines and their  
690 parental cell lines (wild type), FPKM values, fold changes and q-values were calculated  
691 using Cuffdiff<sup>42</sup> within Cufflinks version 2.2.1 package and GENCODE v25 annotation  
692 file (protein-coding genes). The principal component analysis (PCA) and representation  
693 of heatmaps and scatter plots were performed using R software.

694

#### 695 **CRISPR/Cas9 gene knock-out**

696 Gene knock-out was performed using transient transfection of pSpCas9(BB)-2A-Puro  
697 (PX459) V2.0 (a gift from Feng Zhang, Addgene plasmid #62988). Oligonucleotides  
698 encoding sgRNA protospacer sequences (Extended Data Table 5) were annealed and  
699 cloned as described previously<sup>47</sup>. sgRNAs were verified by sequencing. Plasmid DNA (1  
700  $\mu\text{g}$ ) was transfected into iPS cells by electroporation followed by selection with 0.5  
701  $\mu\text{g}/\text{mL}$  puromycin for 48 hours. Surviving cells were allowed to recover and then  
702 replated at low density before picking isolated colonies. For overview of knock-out  
703 reporter line establishment and details of used sgRNAs see Extended Data Fig. 4 and  
704 Extended Data Table 5.4.

705

#### 706 **Whole exome sequencing and variant calling**

707 Whole exome sequencing was performed as previously described<sup>48,49</sup>. Briefly, DNA (3  
708  $\mu\text{g}$ ) was sheared with S2 Focused-ultrasonicator (Covaris, Woburn, MA, USA) and  
709 processed by SureSelectXT Human All Exon V5 (Agilent Technologies, Santa Clara,  
710 CA, USA). Captured DNA was sequenced using HiSeq 2000 (Illumina, San Diego, CA,  
711 USA) with 101 bp pair-end reads with seven indices. Image analysis and base calling  
712 were performed using HCS, RTA and CASAVA software (Illumina). Reads were  
713 mapped to the reference human genome (hg19) by Novoalign-3.02.04. Aligned reads  
714 were processed by Picard to remove PCR duplicates. Variants were called by GATK  
715 v2.7-4 following GATK Best Practice Workflow v3<sup>50</sup> and annotated by ANNOVAR<sup>51</sup>.

716 All the variants of the candidate genes, which have been reported to cause SCD or CS,  
717 were evaluated using five databases: gnomAD, Human Gene Mutation Database  
718 (HGMD), SIFT, PolyPhen-2, MutationTaster.

719

#### 720 **Quality control of established iPSCs**

721 Morphological images of iPSC colonies were captured using Olympus CKX41  
722 microscope with a PlanApo 10×/0.75 objective lens (Olympus) and Nikon digital camera  
723 DS-Fil. Chromosomal G-banding analyses were performed by Chromocenter Inc, Tottori,  
724 Japan. Genomic DNA and total RNA were extracted with AllPrep DNA/RNA mini kit  
725 (Qiagen) following the manufacturer's instructions. Genomic DNA was diluted into 25  
726 ng/ml in distilled water. cDNA was synthesized using PrimeScript™ RT Master Mix  
727 (Takara) from 500 ng total RNA and diluted 1:10 in RNase-free water for *OCT3/4* and  
728 *NANOG* mRNA expression analysis, and 1 µg total RNA for TaqMan™ hPSC  
729 Scorecard™ analysis. *OCT3/4* and *NANOG* mRNA expression were confirmed by  
730 quantitative real-time PCR (qRT-PCR) with TaqMan™ assay using StepOnePlus™ Real-  
731 Time PCR Systems (Thermo Fisher). Primers and probe sequences are provided in  
732 Extended Data Table 5.2. The expression values of target genes were normalized by  
733 *GAPDH* expression from the same cDNA templates and calculated relative to 201B7 iPSC  
734 cell line. Residual plasmids used for iPSC establishment were analyzed by TaqMan™  
735 quantitative PCR using StepOnePlus™ Real-Time PCR Systems (Thermo Fisher). Primer  
736 and probe sequences (cmCAG: common-CAG) are designed on CAG-promoter region  
737 included in all of the episomal vectors for iPSC generation and listed in Extended Data  
738 Table 5.2. The residual plasmid numbers were determined by a standard curve method  
739 with pCE-OCT3/4 episomal plasmid of known quantity using 50 ng genomic DNA of  
740 STD-iPSCs at passage 6.

741

#### 742 **Initial validation of established iPSCs**

743 Established (patient) iPSCs together with control human PSCs were differentiated into  
744 ectoderm, mesoderm and endoderm lineages using STEMdiff™ Trilineage  
745 Differentiation Kit (STEMCELL Technologies). hPSCs reaching 70–80% confluency  
746 were harvested with TrypLE™ Select Enzyme (1X) (Thermo Fisher) and plated as a  
747 single cell suspension in mTeSR1 medium (STEMCELL Technologies) containing 10  
748 µM Y27632 (Wako) on 6-well plates coated with Matrigel (BD Biosciences). The cells  
749 were plated at  $4.0 \times 10^5$  cells,  $2.0 \times 10^5$  cells and  $4.0 \times 10^5$  cells per well for ectoderm,  
750 mesoderm and endoderm differentiation culture respectively and differentiated following  
751 the manufacturer's instructions. For FACS-based evaluation of undifferentiated PSCs and  
752 each of the three germ layers ( $1.0 \times 10^6$  cells each) were fixed with 4% paraformaldehyde  
753 phosphate buffer solution (4% PFA/PBS) for 20 minutes at 4°C and washed twice with  
754 staining medium, which contained PBS with 2% fetal bovine serum (FBS). Samples were  
755 permeabilized with BD Perm/Wash buffer (BD Biosciences) for 15 minutes at room  
756 temperature and stained with fluorescence-conjugated primary antibodies listed in  
757 Extended Data Table 6.3. The samples were washed with BD Perm/Wash buffer twice  
758 and suspended into staining medium. Flow cytometric analysis was performed using LSR  
759 (BD Biosciences). FACS data was analyzed and graphs were generated using FlowJo  
760 software (FlowJo LLC). For transcript level assessment of differentiation capacity, qPCR  
761 was performed with 384-well TaqMan™ hPSC Scorecard™ panel (Thermo Fisher) by

762 QuantStudio™ 12K Flex Real-Time PCR System (Thermo Fisher) using undifferentiated  
763 PSC and each of the three germ layers cDNA samples. Pluripotency and differentiation  
764 property into ectoderm, mesoderm and endoderm lineages were scored by hPSC  
765 Scorecard Analysis software, which is available on the Thermo Fisher website  
766 ([https://www.thermofisher.com/jp/en/home/life-science/stem-cell-research/taqman-hpsc-](https://www.thermofisher.com/jp/en/home/life-science/stem-cell-research/taqman-hpsc-scorecard-panel.html)  
767 [scorecard-panel.html](https://www.thermofisher.com/jp/en/home/life-science/stem-cell-research/taqman-hpsc-scorecard-panel.html)).

768

### 769 **Gene correction of patient iPSCs**

770 Correction of mutations in patient iPSCs was performed using the MhAX method as  
771 previously described<sup>28</sup>. Briefly, donor plasmids for correction of each mutant allele were  
772 created by PCR amplification of the right arm from the cloned genomic DNA of STD  
773 patient cells corresponding to the matching mutant allele, and the left arm from normal  
774 201B7 iPSC using the common primers listed in Extended Data Table 5. InFusion  
775 cloning (Clontech) was used to assemble the arms with a restriction-digested  
776 CAG::mCherry-IRES-puro selection cassette (Addgene plasmid #113876) and  
777 CAG::GFP plasmid backbone (Addgene plasmid #107281). PCR-amplified regions and  
778 InFusion junctions were verified by sequencing. Oligonucleotides encoding sgRNA  
779 protospacer sequences (Extended Data Table 5) were annealed and cloned into pX330-  
780 U6-Chimeric\_BB-CBh-hSpCas9 (a gift from Feng Zhang, Addgene plasmid # 42230) as  
781 described previously<sup>47</sup>. sgRNAs were verified by sequencing. For gene targeting, allele-  
782 matched donor plasmids (3 µg) and Cas9 / sgRNA expression plasmids (1 µg) were co-  
783 transfected by electroporation into  $1.0 \times 10^6$  STD-A/F patient iPSCs, which were then  
784 divided and plated under feeder-free conditions for 48 hours in AK02N medium  
785 (Ajinomoto) containing 10 µM ROCK inhibitor Y27632 (Wako) before initiating  
786 antibiotic selection (0.5 µg/mL puromycin, Sigma-Aldrich). Nine days after plating,  
787 puromycin-resistant cells were pooled and passaged. GFP<sup>neg</sup> / mCh<sup>pos</sup> colonies were  
788 isolated, cultured, stored, and processed for genomic DNA isolation under feeder-free  
789 conditions in 96-well format. iPSC clones positive for PCR genotyping and sequencing  
790 were defrosted and expanded for genomic DNA extraction and Southern blot verification.  
791 For cassette excision, 3 µg of the pX-EGFP-g1 expression plasmid (Addgene plasmid  
792 #107273)<sup>28</sup> was transfected into  $1.0 \times 10^6$  gene-targeted patient iPSCs, which were then  
793 divided and plated under feeder-free conditions for 48 hours in AK02N medium  
794 containing 10 µM Y27632, followed by growth without selection for a total of 6 days.  
795 mCh<sup>neg</sup> cells were isolated by FACS on a BD FACSAria II cell sorter, and plated at low  
796 density for clonal isolation after 8 days. Isolated clones were cultured, stored in 96-well  
797 format, then genotyped for cassette excision by PCR and sequencing before final  
798 verification by Southern blot.

799

### 800 **Genomic DNA extraction**

801 Genomic DNA for PCR amplification and sequencing was isolated from  $0.5 - 1.0 \times 10^6$   
802 iPS cells using a DNeasy Blood and Tissue Kit (Qiagen). Genomic DNA for Southern  
803 blotting was isolated from a single confluent well of a 6-well dish using lysis buffer (100  
804 mM Tris-HCl, pH 8.5, 5 mM EDTA, 0.2% SDS, 200 mM NaCl, and 1 mg/mL Proteinase  
805 K) followed by phenol-chloroform extraction and ethanol precipitation from the aqueous  
806 phase. Genomic DNA was eluted from columns or resuspended from precipitate in TE  
807 pH 8.0.

808

### 809 **iPSC genotyping**

810 PCR primers flanking annotated coding exons of *DLL3* (Accession NG\_008256.1), *HES7*  
811 (Accession NG\_015816.1), and *LFNG* (Accession NG\_008109.2), *MESP2* (Accession  
812 NG\_008608.1) were designed using NCBI Primer-BLAST with optional settings filtering  
813 human repeats and SNPs, with primer pair specificity checking to *H. sapiens*  
814 (taxid:9606). PCR primers for genotyping gene-edited cell lines were designed using  
815 similar principles. All genotyping primers are listed in Extended Data Table 5. Genomic  
816 PCR was carried out using KAPA HiFi HotStart (KAPA Biosystems) on a Veriti 96-well  
817 Thermal Cycler (Applied Biosystems) according to the manufacturer's instructions.  
818 Specific PCR conditions are available upon request. PCR products were treated with  
819 ExoSAP-IT Express (Affymetrix) and sequenced with the primers indicated in Extended  
820 Data Table 5 using BigDye Terminator v3.1 Cycle Sequencing Kit (Applied Biosystems)  
821 on a 3130xl Genetic Analyzer (Applied Biosystems). Sequence analysis was performed  
822 using variant calling in Sequencher (Genecodes) or alignment in Snapgene (GSL Biotech  
823 LLC.). For *MESP2* gene correction, patient and rescued iPSC cells were analyzed by  
824 Southern blotting as described previously<sup>28</sup>. Probe regions were PCR amplified with Ex  
825 Taq (Takara) directly from genomic DNA or cloned plasmid templates to incorporate  
826 DIG-labeled dUTP (Roche) using the primers described in Extended Data Table 5.  
827 Genomic DNA (5-10 µg) was digested with *EcoRI*. Genomic DNA from patient iPSCs  
828 and iPSC clones rescued by gene editing were genotyped using an Infinium  
829 OmniExpress-24 v1.2 (Illumina) SNP array according to the manufacturer's  
830 recommendations. Data collection was performed on an iScan Bead Array Scanner  
831 (Illumina). Data was compared to the reference human genome (hg19) using a  
832 combination of PennCNV, cnvPartition, GWAS tools, and MAD. Karyograms were  
833 prepared in R (version 3.2.5) using GWASTools (version 1.16.1)<sup>52</sup>.

834

### 835 **Data accessibility**

836 All RNA sequencing data utilized for this study have been deposited in Gene Expression  
837 Omnibus (<https://www.ncbi.nlm.nih.gov/geo/>) under the accession number GSE116935.

838

- 839 31 Nakagawa, M. *et al.* A novel efficient feeder-free culture system for the derivation of  
840 human induced pluripotent stem cells. *Sci Rep* **4**, 3594, doi:10.1038/srep03594 (2014).  
841 32 Takahashi, K. *et al.* Induction of pluripotent stem cells from adult human fibroblasts by  
842 defined factors. *Cell* **131**, 861-872, doi:10.1016/j.cell.2007.11.019 (2007).  
843 33 Wataya, T. *et al.* Minimization of exogenous signals in ES cell culture induces rostral  
844 hypothalamic differentiation. *Proc Natl Acad Sci U S A* **105**, 11796-11801,  
845 doi:10.1073/pnas.0803078105 (2008).  
846 34 Zhao, J. *et al.* Small molecule-directed specification of sclerotome-like  
847 chondroprogenitors and induction of a somitic chondrogenesis program from embryonic  
848 stem cells. *Development* **141**, 3848-3858, doi:10.1242/dev.105981 (2014).  
849 35 Yamashita, A. *et al.* Generation of scaffoldless hyaline cartilaginous tissue from human  
850 iPSCs. *Stem Cell Reports* **4**, 404-418, doi:10.1016/j.stemcr.2015.01.016 (2015).  
851 36 Chal, J. *et al.* Generation of human muscle fibers and satellite-like cells from human  
852 pluripotent stem cells in vitro. *Nat Protoc* **11**, 1833-1850, doi:10.1038/nprot.2016.110  
853 (2016).



854 37 Mandegar, M. A. *et al.* CRISPR Interference Efficiently Induces Specific and Reversible  
855 Gene Silencing in Human iPSCs. *Cell Stem Cell* **18**, 541-553,  
856 doi:10.1016/j.stem.2016.01.022 (2016).  
857 38 Li, X. *et al.* Generation of destabilized green fluorescent protein as a transcription  
858 reporter. *J Biol Chem* **273**, 34970-34975 (1998).  
859 39 Nakajima, T. *et al.* Modeling human somite development and fibrodysplasia ossificans  
860 progressiva with induced pluripotent stem cells. *Development* **145**,  
861 doi:10.1242/dev.165431 (2018).  
862 40 Kim, D., Langmead, B. & Salzberg, S. L. HISAT: a fast spliced aligner with low memory  
863 requirements. *Nat Methods* **12**, 357-360, doi:10.1038/nmeth.3317 (2015).  
864 41 Martin, M. Cutadapt removes adapter sequences from high-throughput sequencing reads.  
865 *EMBnet.journal* **17**, 10-12, doi:10.14806/ej.17.1.200pp. 10-12 (2011).  
866 42 Trapnell, C. *et al.* Differential analysis of gene regulation at transcript resolution with  
867 RNA-seq. *Nat Biotechnol* **31**, 46-53, doi:10.1038/nbt.2450 (2013).  
868 43 Anders, S., Pyl, P. T. & Huber, W. HTSeq--a Python framework to work with high-  
869 throughput sequencing data. *Bioinformatics* **31**, 166-169,  
870 doi:10.1093/bioinformatics/btu638 (2015).  
871 44 McCarthy, D. J., Chen, Y. & Smyth, G. K. Differential expression analysis of multifactor  
872 RNA-Seq experiments with respect to biological variation. *Nucleic Acids Res.* **40**, 4288-  
873 4297, doi:10.1093/nar/gks042 (2012).  
874 45 Yang, R. & Su, Z. Analyzing circadian expression data by harmonic regression based on  
875 autoregressive spectral estimation. *Bioinformatics* **26**, i168-174,  
876 doi:10.1093/bioinformatics/btq189 (2010).  
877 46 Huang da, W., Sherman, B. T. & Lempicki, R. A. Systematic and integrative analysis of  
878 large gene lists using DAVID bioinformatics resources. *Nat. Protoc.* **4**, 44-57,  
879 doi:10.1038/nprot.2008.211 (2009).  
880 47 Ran, F. A. *et al.* Genome engineering using the CRISPR-Cas9 system. *Nat Protoc* **8**,  
881 2281-2308, doi:10.1038/nprot.2013.143 (2013).  
882 48 Guo, L. *et al.* Novel and recurrent XYLT1 mutations in two Turkish families with  
883 Desbuquois dysplasia, type 2. *J Hum Genet* **62**, 447-451, doi:10.1038/jhg.2016.143  
884 (2017).  
885 49 Guo, L. *et al.* Identification of a novel LRRK1 mutation in a family with osteosclerotic  
886 metaphyseal dysplasia. *J Hum Genet* **62**, 437-441, doi:10.1038/jhg.2016.136 (2017).  
887 50 McKenna, A. *et al.* The Genome Analysis Toolkit: a MapReduce framework for  
888 analyzing next-generation DNA sequencing data. *Genome Res* **20**, 1297-1303,  
889 doi:10.1101/gr.107524.110 (2010).  
890 51 Wang, K., Li, M. & Hakonarson, H. ANNOVAR: functional annotation of genetic  
891 variants from high-throughput sequencing data. *Nucleic Acids Res* **38**, e164,  
892 doi:10.1093/nar/gkq603 (2010).  
893 52 Gogarten, S. M. *et al.* GWASTools: an R/Bioconductor package for quality control and  
894 analysis of genome-wide association studies. *Bioinformatics* **28**, 3329-3331,  
895 doi:10.1093/bioinformatics/bts610 (2012).  
896  
897  
898  
899

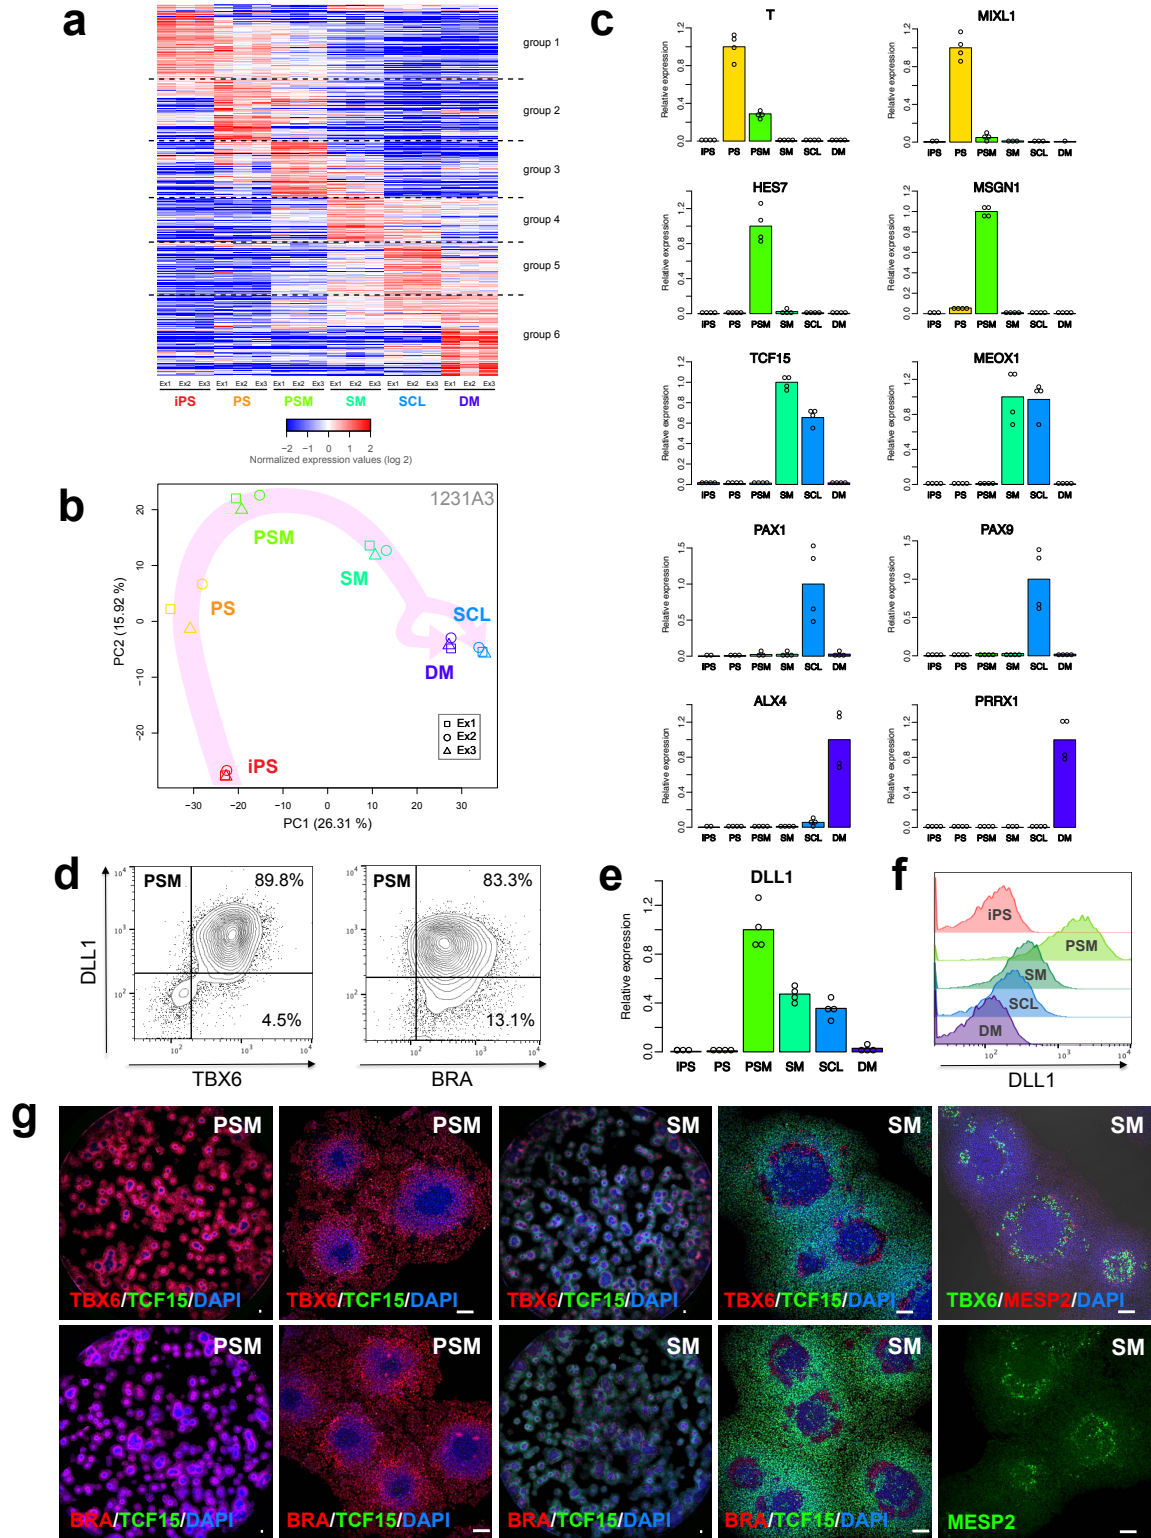

901  
 902 **Extended Data Fig. 1 | Characterization of step-wise induced human presomitic**  
 903 **(PSM) and somitic mesoderm (SM).** **a**, Heatmap of gene expression levels in step-wise  
 904 induced human PSM and its derivatives (using iPSC-line 1231A3). FPKM values of each

905 gene were normalized to mean of all samples. The gene order is the same as in Fig. 1b. **b**,  
906 PCA analysis of transcript expression levels in human PSM and derivatives (1231A3). **c**,  
907 qRT-PCR based validation of RNA-seq results; summary of four independent  
908 experiments with three technical replicas each using 201B7. Similar results were obtained  
909 for 1231A3 (data not shown). It should be noted that open circles in some conditions are  
910 less than four because no Ct values in the samples were obtained after 45 cycles of PCR  
911 to calculate expression values. **d**, Flow cytometry-based evaluation of DLL1 and TBX6  
912 (left) as well as DLL1 and BRACHYURY (BRA) (right) expression at PSM stage  
913 (1231A3). **e**, Expression of *DLL1* on transcript level throughout the different stages of  
914 induction (201B7). **f**, Expression of DLL1 on protein level. Correlation of FACS data  
915 with qRT-PCR results (201B7) shown in (e). **g**, Immunofluorescence staining of PSM  
916 markers TBX6 and BRA as well as somitic mesoderm marker TCF15 at PSM (left half  
917 panels) and SM (right half panels) stages; entire wells (left) and magnified views of  
918 selected areas (right). Staining of segmentation marker MESP2 (alone or co-staining with  
919 TBX6) shown in far right side of panel. Scale bar: 100  $\mu$ m.

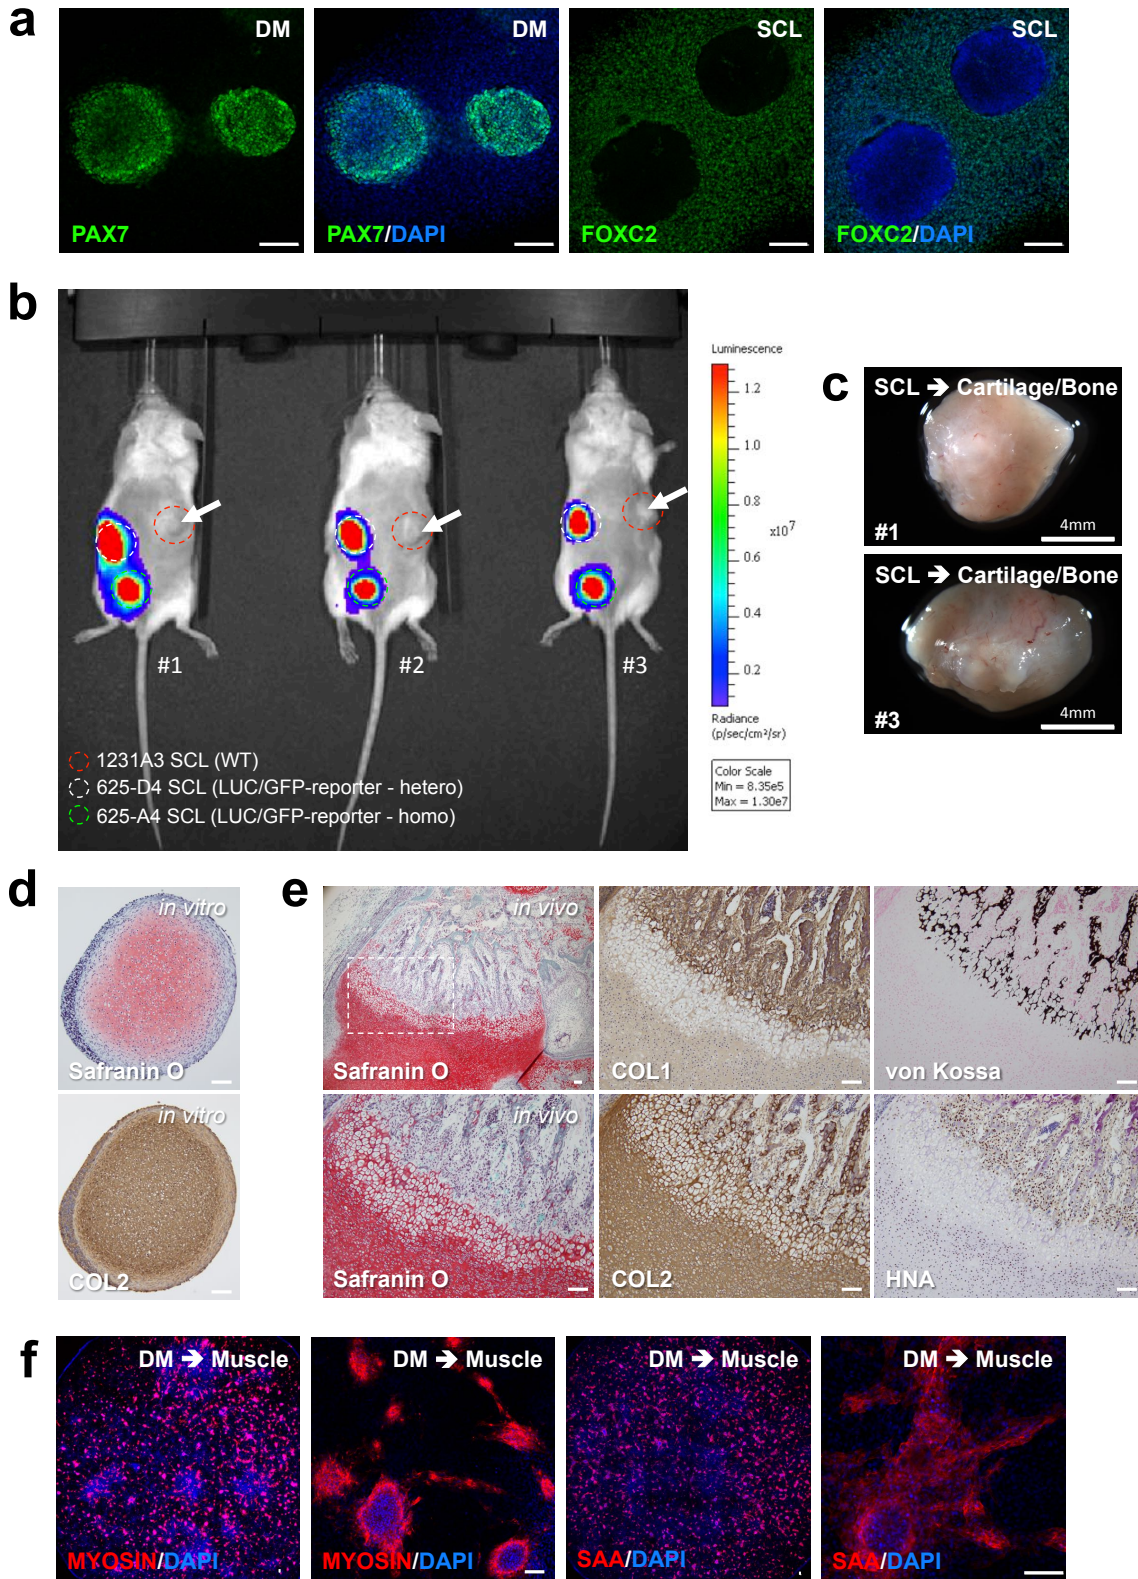

920  
921  
922  
923

**Extended Data Fig. 2 | Molecular and functional characterization of step-wise induced human PSM-derivatives, sclerotome (SCL) and dermomyotome (DM). a,** Developmental-stage specific expression of DM (PAX7) and SCL (FOXC2) markers on

924 protein level (201B7). Scale bar: 100  $\mu$ m. **b**, Assessment of *in vivo* bone and cartilage  
925 forming ability of human sclerotome (SCL). Subcutaneous transplantation of PSC-  
926 derived SCL step-wise induced from WT (1231A3) and luciferase reporter lines (625-D4  
927 and 625-A4). Evaluation of transplanted cells via IVIS at two months post-  
928 transplantation. Injection sides are marked by dashed/colored circles. Cartilage and bone  
929 forming areas of WT iPSC line (1231A3) marked by white arrows. **c**, Whole-mount  
930 images of WT SCL-derived *in vivo* cartilage/bone tissues isolated from transplanted mice  
931 #1 and #3. Explant isolated from mice #2 is shown in Fig. 1i. **d**, Staining of *in vitro*  
932 human SCL derived cartilage (3D-CI) sections. Observed Safranin O and type II collagen  
933 (COL2) signals are indicative of *in vitro* cartilage formation. **e**, Sections and staining of  
934 area shown in Fig. 1i; Safranin O and COL2 staining in human *in vivo* SCL-derived  
935 cartilage areas; von Kossa and COL1 staining in ossifying cartilage and forming bone  
936 areas. Majority of cells contributing to cartilage/bone formation are HNA positive and of  
937 human origin (right lower panel). Scale bar: 100  $\mu$ m. **f**, Evaluation of *in vitro* muscle  
938 induction from human DM. Myosin and sarcomeric alpha-actinin (SAA) staining of *in*  
939 *vitro* DM-derived skeletal muscle; representative images of entire well (left) and  
940 magnified areas (right). Scale bar: 100  $\mu$ m.



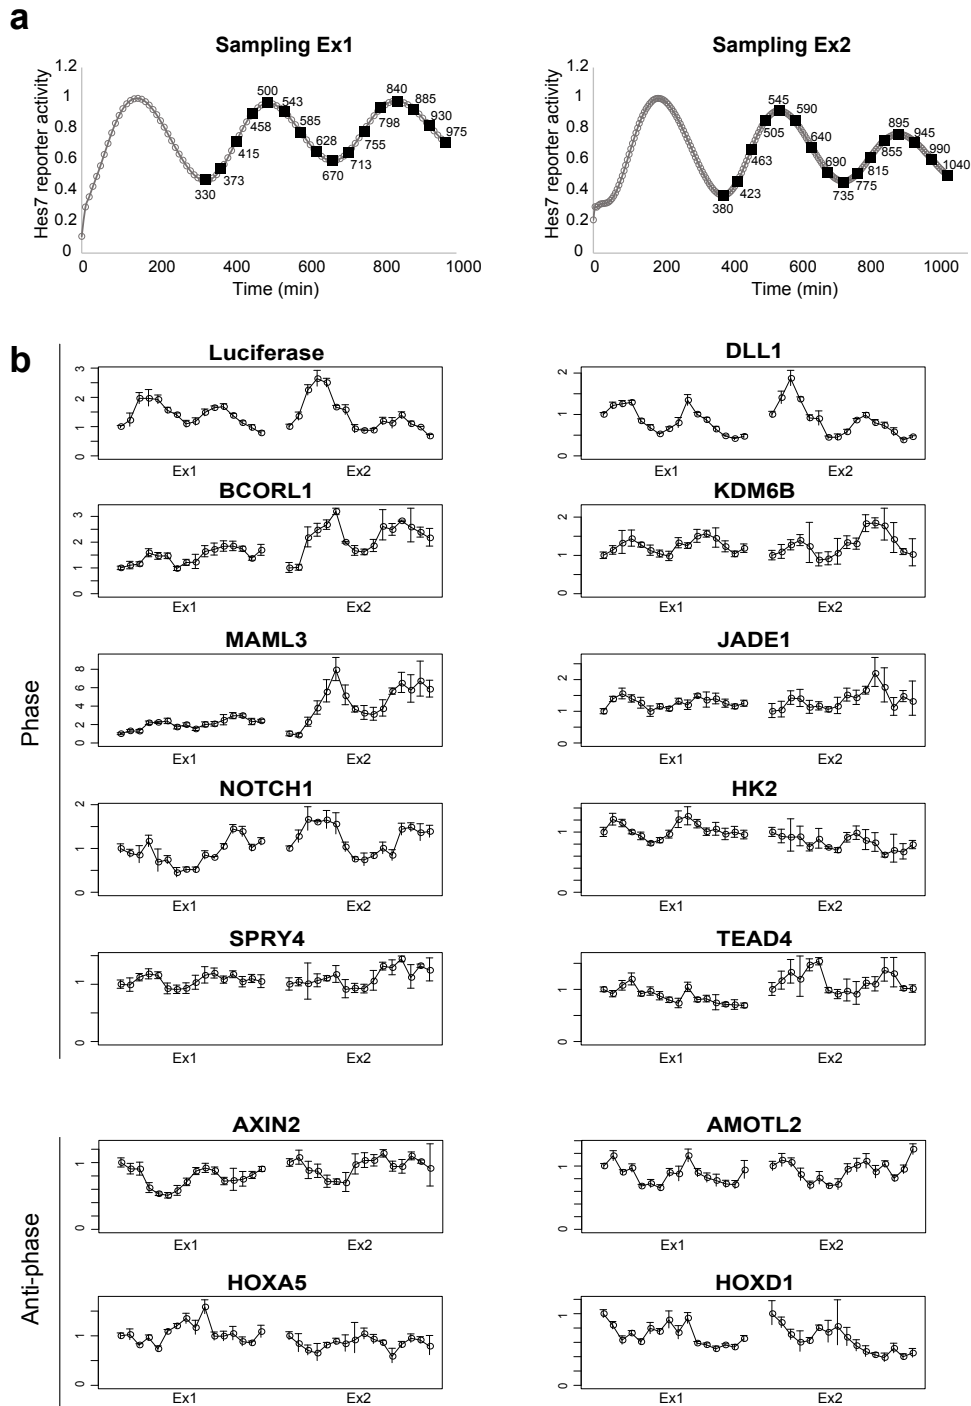

941  
 942 **Extended Data Fig. 3 | Isolation and transcriptome analysis of timely coordinated**  
 943 **human PSM samples.** **a**, Sampling for RNA-seq. HES7-reporter activity was  
 944 continuously monitored with one sample, and the other samples were frozen at each time  
 945 point indicated in the graph. **b**, qRT-PCR validation of identified novel phase and  
 946 anti-phase oscillating genes. *DLL1* and *AXIN2* show clear phase or anti-phase oscillation  
 947 despite not being included into high stringency cut-off RNA-seq candidate list. Error bars  
 948 indicate S.D. of three technical replicas for each time point and sample set.

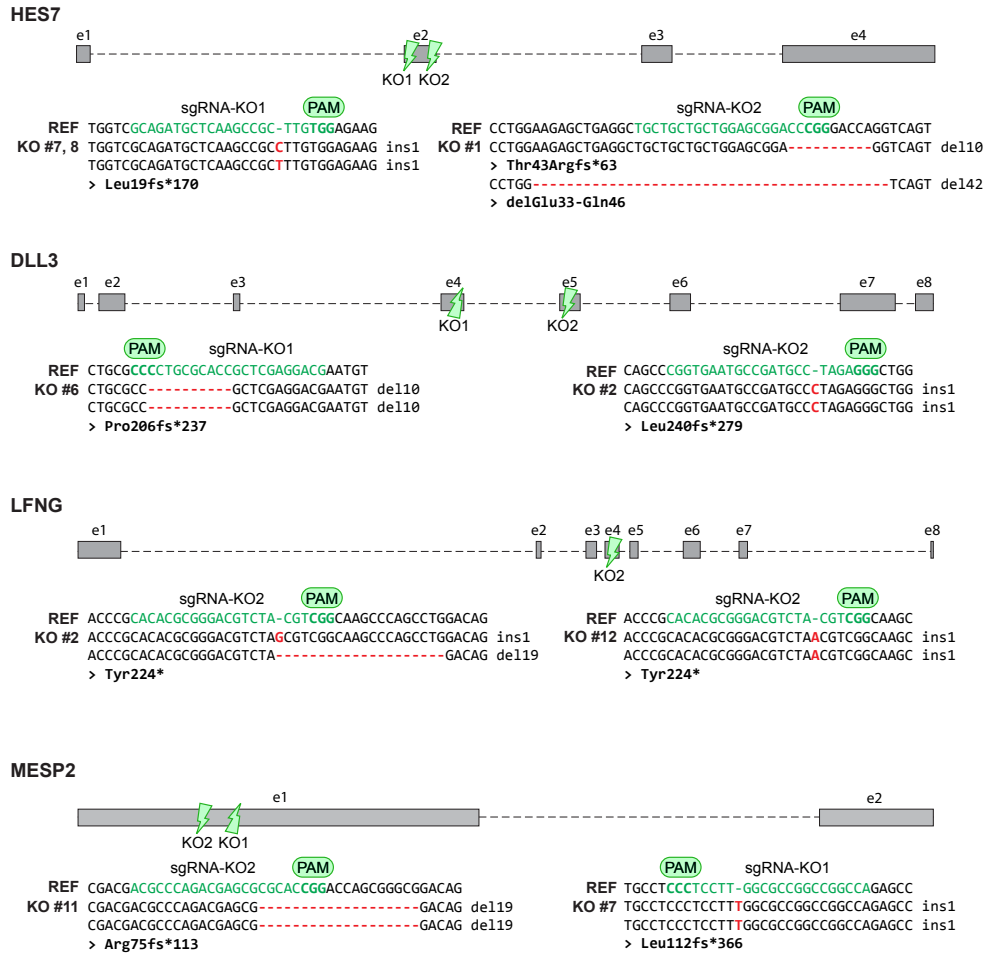

949  
 950  
 951  
 952  
 953  
 954  
 955  
 956

**Extended Data Fig. 4 | Overview of knock-out reporter line generation.** Schematics of the *HES7*, *DLL3*, *LFNG*, and *MESP2* genes. Positions of the sgRNAs used in this study are shown. sgRNAs were designed to target at or near regions of known pathogenic mutations, particularly those resulting in frameshifts and premature termination. Sequence analysis of iPSC clones used in this study indicating indel mutations generated by Cas9. Predicted effects on the protein sequence are listed below the sequence alignments.



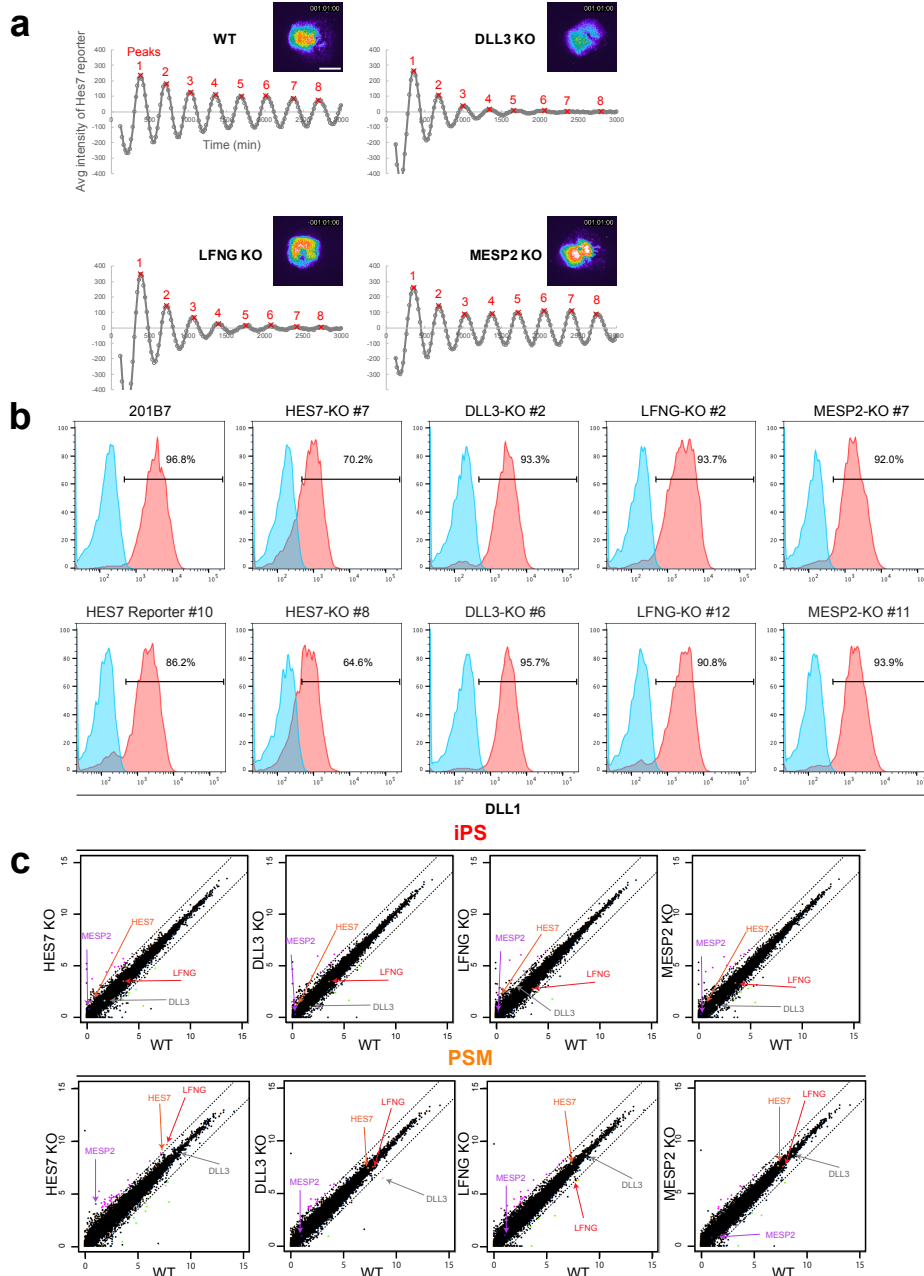

957  
 958 **Extended Data Fig. 5 | Characterization of knock-out reporter lines.** **a**, Oscillation  
 959 damping rate of knock-out PSMs in 3D-synchronization assay. Average signal of the  
 960 entire image at each time point was measured using the sample shown in Extended Data  
 961 Movie 3. The signal was detrended ( $\pm 2$  hours), and each oscillation peak was detected to  
 962 define the amplitude. Representative images and graphs of three independent experiments  
 963 are shown. Scale bar: 500  $\mu\text{m}$ . **b**, Evaluation of DLL1 expression via FACS analysis at  
 964 iPSC and PSM stages of healthy control and knock-out iPSC lines. PSM induction  
 965 efficiency is high in all analyzed samples; slight reduction of DLL1 induction efficiency  
 966 in HES7-KO lines. Representative results of two different knock-out lines each are  
 967 shown. **c**, Scatter plot of transcriptome analysis of wild type and KO lines at iPSC and  
 968 PSM stages. Positions of expression values for *MESP2*, *DLL3*, *LFNG* and *HES7* are  
 969 highlighted with colored arrows.

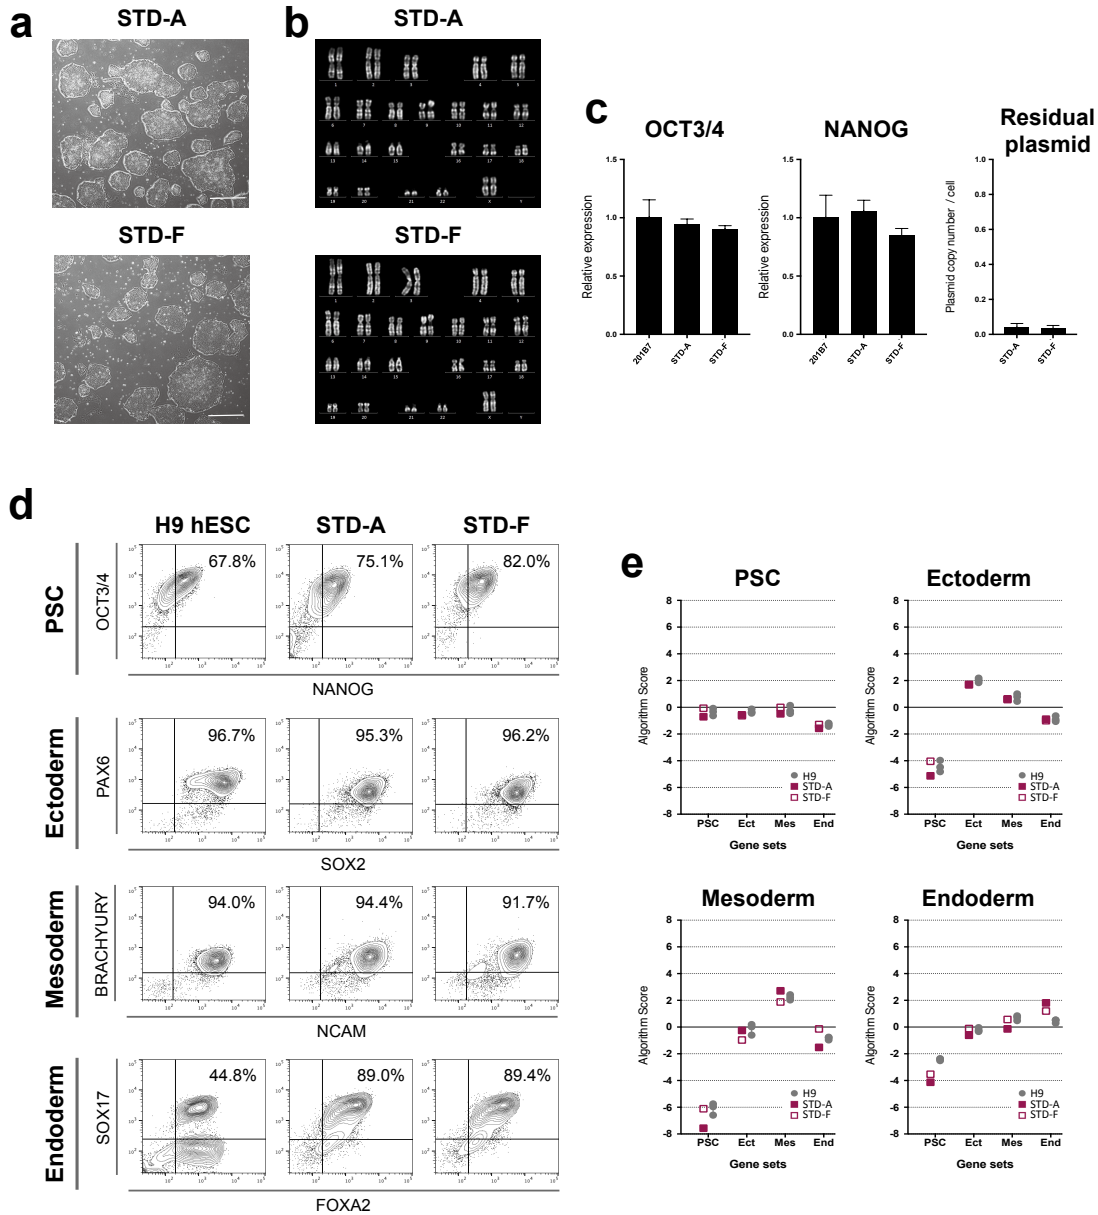

970  
971  
972  
973  
974  
975  
976  
977  
978  
979  
980  
981

**Extended Data Fig. 6 | Initial characterization of STD patient iPSC line.** **a**, Bright field view of STD iPSC clones STD-A and STD-F. Scale bar: 500  $\mu$ m. **b**, Normal karyotype (46, XX) in both clones of STD patient iPSC line by chromosomal G-banding analysis. **c**, Expression of pluripotency markers *OCT3/4* and *NANOG* in STD-A and STD-F cells compared to WT iPSC line (201B7). Quantification of residual plasmid levels in STD clones (right side of panel). **d**, FACS-based evaluation of differentiation capacity into three germ layers of healthy control (H9 hESC) and patient lines (STD-A and STD-F). **e**, Quantification of differentiation capacity into ectoderm, mesoderm and endoderm at transcript level.

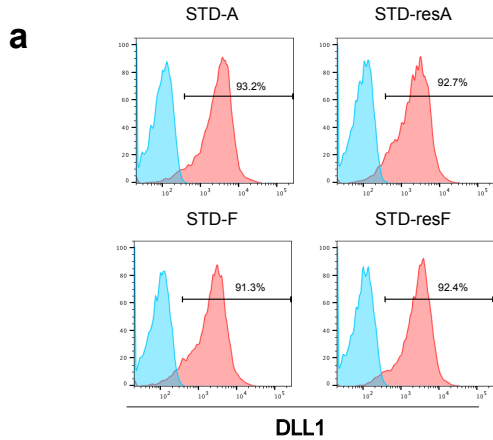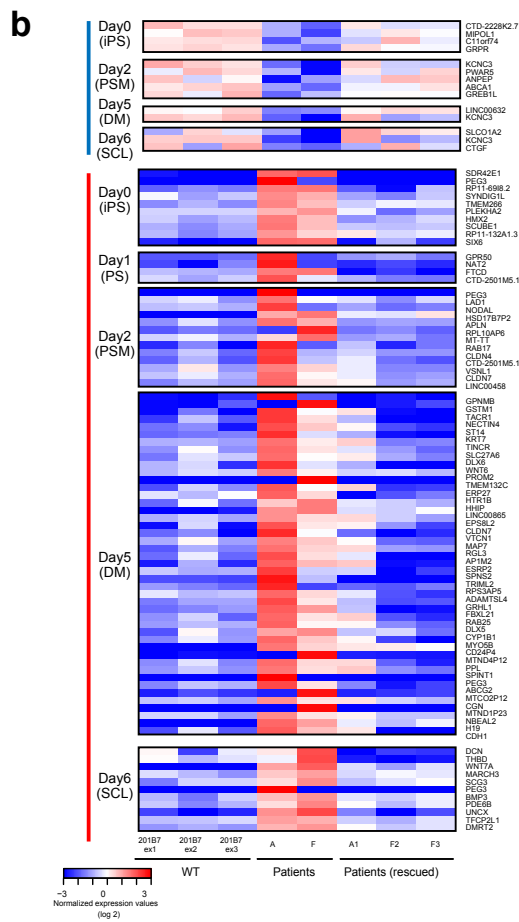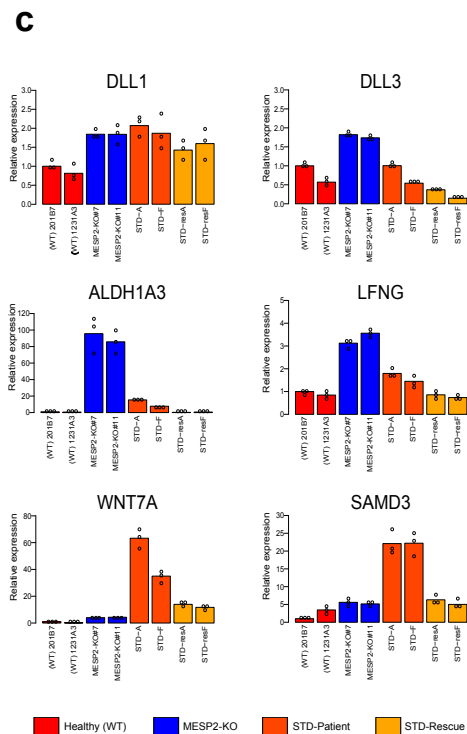

982  
983  
984  
985  
986  
987  
988  
989  
990  
991

**Extended Data Fig. 7 | Comparison of patient vs. rescue STD lines.** **a**, Representative DLL1 expression in PSM-derived from STD patient (STD-A and STD-F) and corresponding rescue lines (STD-resA and STD-resF); n=3. **b**, Heatmap of gene expression levels of transcripts differentially expressed in patient lines STD-A and STD-F, when compared to wild-type (201B7) and corrected rescue clones (STD-resA (A1) and STD-resF (F2 and F3)). Analysis covers all stages of step-wise PSM induction and differentiation. For SM stage data see Fig. 4e and Extended Fig. 7c. **c**, qRT-PCR-based validation of additional candidates found via RNA-seq to be up-regulated in STD patient lines at the SM stage. Data of three independent experiments are shown.

992  
993

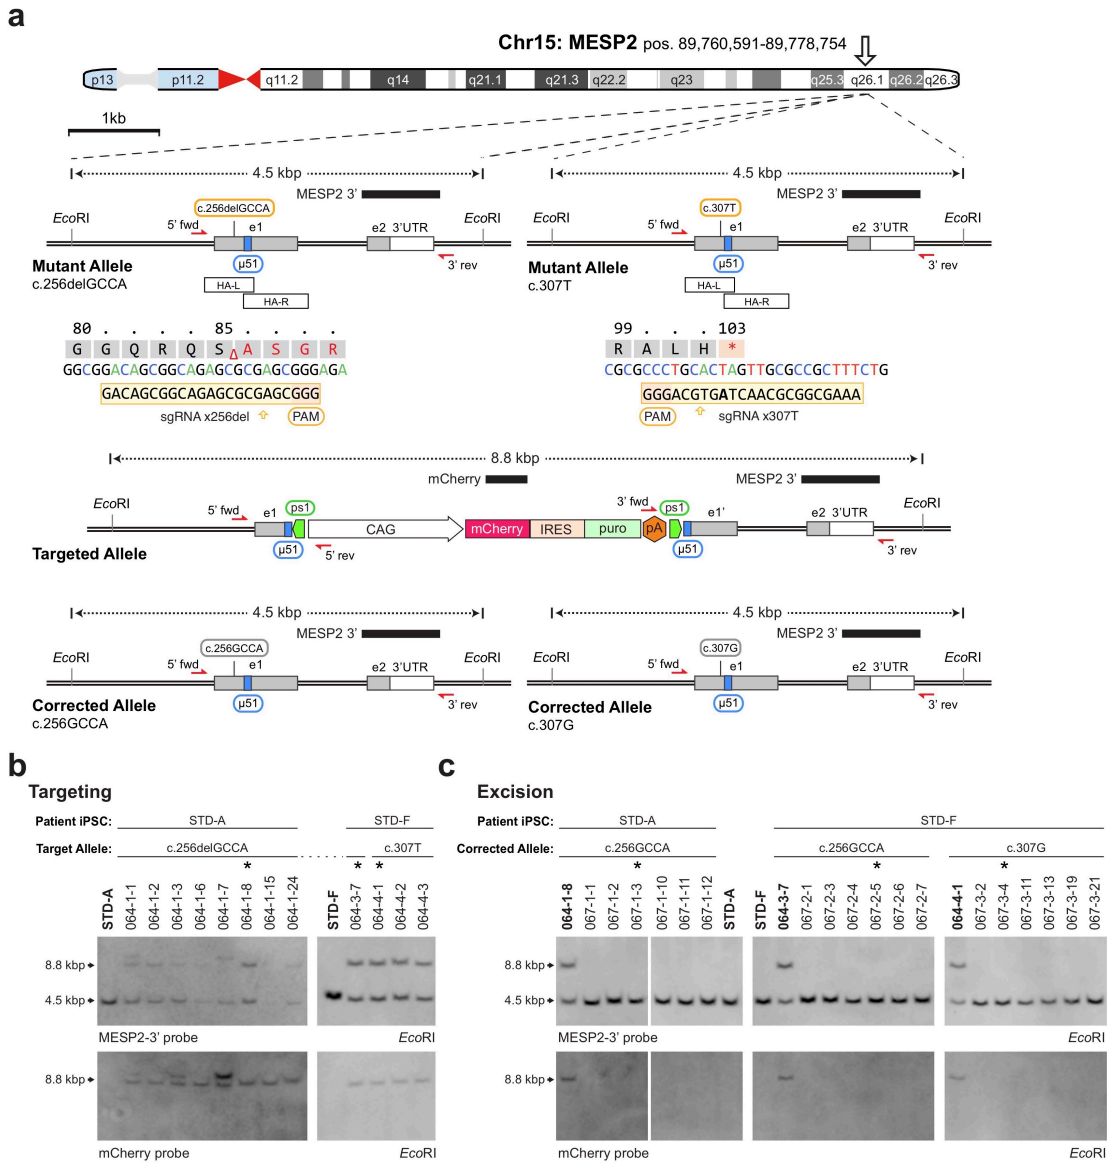

994  
995  
996  
997  
998  
999  
1000  
1001  
1002  
1003  
1004  
1005  
1006  
1007

**Extended Data Fig. 8 | Allele-specific gene correction of *MESP2* in patient iPSC cells.**

**a**, Detailed schematic of the gene correction strategy described in Fig. 4e, 4f. Depicted are the two mutant or corrected *MESP2* alleles with coding and non-coding exons (grey and white), overlapping donor vector homology arms (HA-L, HA-R), engineered 51 bp microhomology ( $\mu 51$ , blue), inverted protospacers for cassette excision (ps1, green), genotyping primers (red arrows), and Southern blotting probes (black bars). The sequences of mutation-specific sgRNAs are shown below each mutant allele. The gene-targeted intermediate shows details of the CAG::mCherry-IRES-puro cassette used for enrichment. **b**, Southern blot analysis of the targeted iPSC clones. Samples marked with an asterisk were selected for cassette excision. **c**, Southern blot analysis of gene corrected iPSC clones following selection marker removal. Samples marked with an asterisk were selected for phenotyping (067-1-3, STD-resA1; 067-2-5, STD-resF2; 067-3-4, STD-resF3).

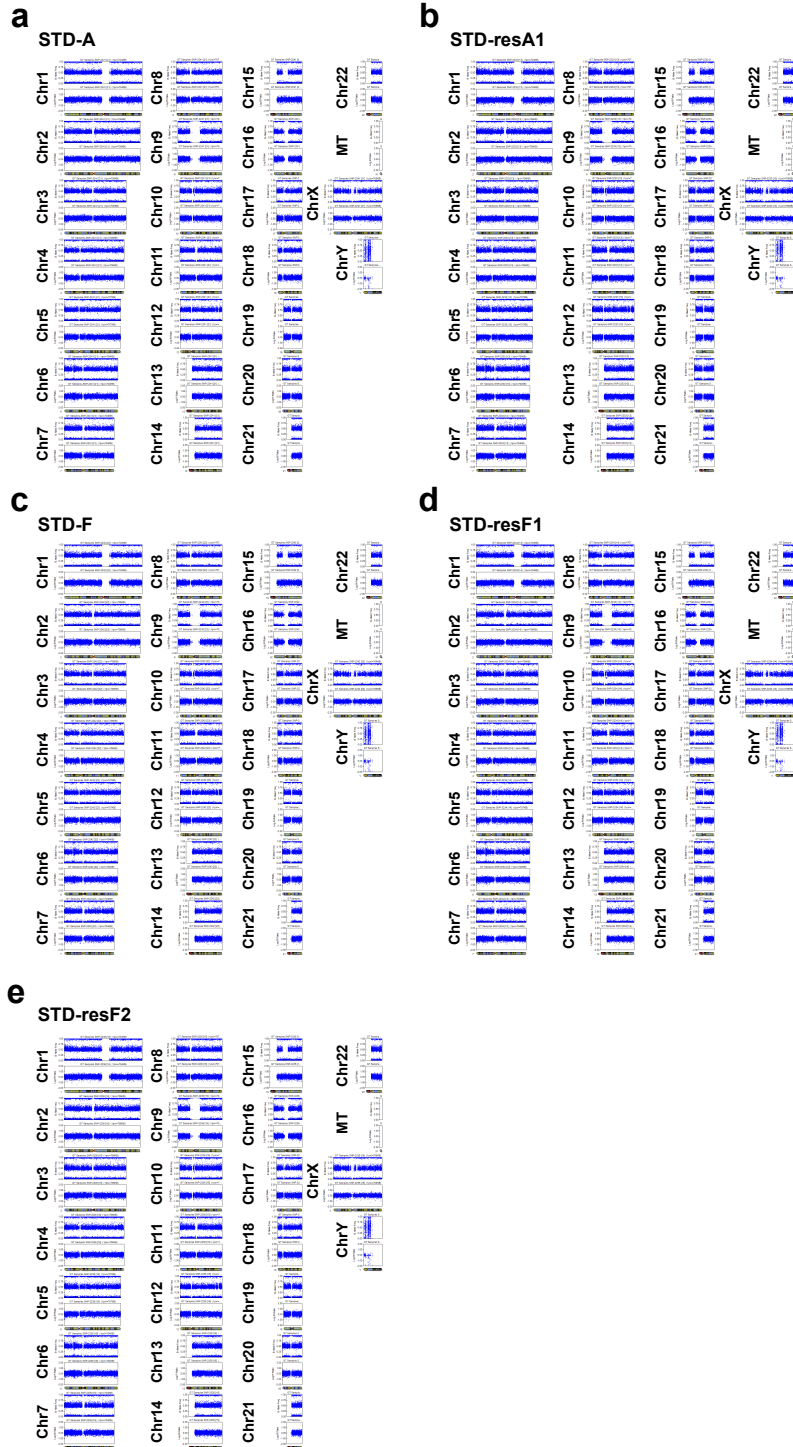

1008  
 1009  
 1010  
 1011  
 1012  
 1013  
 1014  
 1015

**Extended Data Fig. 9 | Evaluation of patient and rescued iPSCs.** **a, b,** Resulting karyograms from SNP array analysis of STD patient iPSC clone A (STD-A) and corresponding rescued iPSC line (STD-resA1). **c-e,** Karyograms from SNP array analysis of STD patient iPSC clone F (STD-F) and corresponding rescued iPSC lines (STD-resF1/F2). No de novo CNVs were detected following gene editing and subcloning. These figures were created by Illumina Genome Viewer (IGV) (Version 1.9.0) on Illumina GenomeStudio V2011.1 with Human:Build 37 genome.

1016 **EXTENDED DATA FILES**

1017

1018 **Extended Data Movie 1 | 3D-synchronization assay for wild-type PSM.**

1019 Bright field view (left) and *HES7* luciferase reporter images (right). Representative data  
1020 of three independent experiments are shown. Scale bar: 500  $\mu\text{m}$ .

1021

1022 **Extended Data Movie 2 | Calcium imaging of contracting DM-derived muscle.**

1023 Representative movies of dermomyotome (DM) derived human skeletal muscle. GCaMP  
1024 reporter line activity (green fluorescence) indicating calcium influx into contracting  
1025 muscle cells. Magnified view of contracting muscle cells showing concomitant calcium  
1026 activity (right side of movie panel). Scale bar: 100  $\mu\text{m}$ .

1027

1028 **Extended Data Movie 3 | 3D-synchronization assay for knock out PSMs.**

1029 *HES7*-reporter activity is shown for WT and *DLL3*-, *LFNG*-, *MESP2*-knock-out PSMs.  
1030 Representative data of three independent experiments are shown. Scale bar: 500  $\mu\text{m}$ .

1031

1032 **Extended Data Table 1 | RNA-seq analysis of human PSM and derivatives.**

1033 Expressed genes arranged into six major expression clusters/groups corresponding to the  
1034 six distinct differentiation and developmental stages analyzed.

1035

1036 **Extended Data Table 2 | List of oscillating human segmentation clock genes.**

1037 Complete list of all phase and anti-phase oscillating genes (high stringency cut-off)  
1038 identified by ARSER algorithm (for details see Methods section).

1039

1040 **Extended Data Table 3 | Pathway-analysis of identified oscillating genes.**

1041 Complete results of pathway and GO analyses for phase and anti-phase oscillating genes.

1042

1043 **Extended Data Table 4 | Recombinant proteins & small molecules used in this study.**

1044 List of utilized recombinant human proteins (4.1) and small molecule agonists and  
1045 inhibitors (4.2).

1046

1047 **Extended Data Table 5 | Primers used in this study.**

1048 List of utilized qRT-PCR primers for differentiation and oscillation assays (5.1), qRT-  
1049 PCR primers for iPSC quality control (5.2), exon-specific primers for genotyping (5.3),  
1050 oligos for sgRNA cloning (5.4), InFusion primers for MhAX targeting vectors (5.5), PCR  
1051 genotyping for MhAX targeting and excision (5.6).

1052

1053 **Extended Data Table 6 | Antibodies used in this study.**

1054 List of utilized primary antibodies (6.1) and secondary antibodies (6.2) for  
1055 immunostaining, and antibodies used for flow cytometric analysis (6.3).

1056

1057

1058 **Extended Data Table 4 | Utilized recombinant proteins and small molecules**

1059

1060 **Extended Data Table 4.1 | Human recombinant proteins**

1061

| Recombinant Human Protein | Company     | Catalog Number |
|---------------------------|-------------|----------------|
| Activin A                 | R&D Systems | 338-AC         |
| bFGF                      | Wako        | 068-04544      |
| BMP4                      | R&D Systems | 314-BP-050     |

1062

1063

1064 **Extended Data Table 4.2 | Small molecule agonists/inhibitors**

1065

| Small Molecule | Company             | Catalog Number | Description           |
|----------------|---------------------|----------------|-----------------------|
| CHIR99021      | Axon Medchem        | 1386           | WNT agonist           |
| LDN193189      | Stemgent            | 04-0074        | BMP inhibitor         |
| PD173074       | Tocris              | 3044           | FGFR inhibitor        |
| SAG            | Calbiochem          | 566661         | HH agonist            |
| SB431542       | Selleck Chemicals   | S1067          | TGF $\beta$ inhibitor |
| GDC0449        | Cellagen Technology | C4044-5        | HH inhibitor          |
| XAV939         | Tocris              | 3748           | WNT inhibitor         |

1066



1067  
1068  
1069  
1070

**Extended Data Table 5 | Primers used in this study**

**Extended Data Table 5.1 | qRT-PCR primers (differentiation and oscillation)**

| Gene       | Forward Primer Sequence | Reverse Primer Sequence |
|------------|-------------------------|-------------------------|
| hALX4      | ATGAATGCTGAGACTTGCGTC   | GGGAAATGCCCTAAAAGGCG    |
| hAMOTL2    | CCTGGGACCAGATGGTCAAT    | GCCACTCTCAGCCATTTTCAG   |
| hARHGAP24  | TCGGGAACCCACAAATGTT     | GTGCTGGCCTAACTCTCCAG    |
| hAXIN2     | GTATCGTCTGCGGGTCTTCC    | CGAGCTCACACTCAATTCCGC   |
| hBCORL1    | AGAGGCTGAAGCTTTCCCTCG   | CACCTGCCTGTAGAACTCGG    |
| hT         | CACTGCATCTTTTCGGGACCT   | GACATCGTGGACAGCCAGTA    |
| hCXXC5     | TCAGTGAGCCCCTCAACAAG    | TTGTCAGCAGACTCTCCGC     |
| hDACT1     | CTGAAGAAAGCGGGGGCTTA    | ACAAAGGTTTTTTCGGGGTG    |
| hDKK1      | GCACCTTGGATGGGTATTCCA   | GCACAACACAATCCTGAGGC    |
| hDLL1      | GGTCCCTGCACGAGGTTATAGT  | AACACCAACAAGAAGGCGGAC   |
| hDMRT2     | TCTCGGTGAATGAACCACTGT   | GAGAGACACGAGTGATGGCA    |
| hDUSP5     | TGCCTACCCACTCAACAGTC    | CCGATTCTCCATCCAGTTT     |
| hFGF18     | TTTCATGAAGCGCTACCCCA    | CTTGGTCACCGTCGTGTA      |
| hHES7      | CTCGGATCTACCGGCTTGG     | TGCTACTTGTCCGTTTCCG     |
| hHK2       | GCCCGCCAGAAGACATTAGA    | GCTCAGACCTCGCTCCATTT    |
| hHOXA5     | CAATCCTCCTTCTGCGGGTC    | CCTACACGCGCTACCAGAC     |
| hHOXD1     | CACCTACCCCAAGTCCGTCT    | TTTCATCCACTCGAACGTGCT   |
| hJADE1     | GGCTGCCTGAGGAAGTAGTG    | CCGCTTGGCTAGATTGTCT     |
| hKDM6B     | GTCCATGAAGCACTGCCAGGT   | GTTGCAGTAGTAGGCTGGCTC   |
| hLFNG      | GCCTGCTTGGAGGAAGGATT    | AGAAAGGCACCTACGCATCG    |
| Luciferase | CGAGGCTACAAACGCTCTCA    | TTGATCAGGCTCTCAGCCG     |
| hMAML3     | CCAGACATGACCATTGGCCT    | AGTCGTGGATGCTAACACGG    |
| hMEOX1     | CTCTTGCCCTTTTTGGGGTG    | GAGGGAGGTCAACGTGAGTT    |
| hMESP1     | CGTCAGTTGTCCCTTGTCACTT  | GCTGGCTCTGTTGGAGACCT    |
| hMESP2     | GGCTTCCCTCTTTCATCCA     | GGAGCCTTGGCTAAAGGAGA    |
| hMIXL1     | GGTACCCCGACATCCACTTG    | ACCTGGAAGAGGGGAGAAAAT   |
| hMSGN1     | CTGCACACCCTCCGGAATTA    | AGGAGGTCTGTGAGTTCCCC    |
| hNOTCH1    | CCAGTCGGAGACGTTGGAAT    | TACTCCTCGCCTGTGGACAA    |
| hPAX1      | CGAAGGCACCGCTTACTCTC    | AAGGCAGGTTTCTCTAGCCC    |
| hPAX9      | CACAACCTGTGACATTCCGGC   | GCCGTGACAGAATGACTACCT   |
| hPLEKHG2   | GGCTCTCTAGACATTCAGGGC   | AAGACTCCAACCTGGCAACG    |
| hPRICKLE2  | AGCTCGATCGCTTGTGACGTA   | TGATTGGTGTTCACCTGCT     |
| hPRRX1     | AGGCTTTGGAGCGTGTCTTT    | GTTACCTGCACTCTCGCCTC    |
| hRHOU      | TCAAAGCCGCCTCTACATC     | CTGTTGCTGAGTGTCCGAGT    |
| hSMAD3     | TGAAACACACGAGCAAACCC    | AAAGTGGGGCCAAAGGGTAA    |
| hSPRY4     | CCTGCACCAAACACATGCAC    | ATGCAAGGAGTGTGCATCCC    |
| hTBX6      | GCGCGGTGTATGGTAGAGG     | CTACTCGGCTGCATTTCTGG    |
| hTCF15     | CCTCCTTCTCCAGGGTCCAG    | CAGCTGCTTGAAGGTGAGGG    |
| hTEAD4     | GGCACCATTACCTCCAACGA    | CCCTCTGCGTCATTGTGAT     |
| hUNCX      | GGAGAAGGCGTTCAACGAGA    | GGAACCAGACCTGAACTCGG    |

1071

1072  
1073

**Extended Data Table 5.2 | qRT-PCR primers (iPSC quality control)**

| Gene    | TaqMan Assay ID | Probe label |
|---------|-----------------|-------------|
| hOCT3/4 | Hs00999634_gH   | FAM/MGB     |
| hNANOG  | Hs02387400_g1   | FAM/MGB     |

1074

| Gene  | Forward Primer Sequence | Reverse Primer Sequence | Probe Sequence     | Probe label |
|-------|-------------------------|-------------------------|--------------------|-------------|
| GAPDH | TGCACCACCAACTGCTTAGC    | TCTTCTGGGTGGCAGTGATG    | ACTCATGACCACAGTCCA | VIC/MGB     |
| cmCAG | GGCTCTGACTGACCGCGTTA    | CAGAAAAGAAACAAGCCGTCATT | TGTAATTAGCGCTTGTT  | FAM/MGB     |

1075  
1076  
1077  
1078

**Extended Data Table 5.3 | Exon genotyping primers**

| Gene    | Exon no.   | ID# /Name | Sequence                 |                       |
|---------|------------|-----------|--------------------------|-----------------------|
| DLL3    | 1, 2       | dna2235   | CGACCACAGACGGAATCTC      |                       |
|         |            | dna2236   | CCCCAGTGTGTAGAGTTTAGAG   |                       |
|         | 3          | dna2237   | TGAACTCTGGCCTTCATTGAG    |                       |
|         |            | dna2238   | CTACATCCAGTACCAGGGACA    |                       |
|         | 4          | dna2239   | CTCCGTATGCATCCATGTTTCG   |                       |
|         |            | dna2240   | GTACCCTGAAGAGGGTGAGTG    |                       |
|         | 5          | dna2241   | GTACCATCTAGTCCCGATGATT   |                       |
|         |            | dna2242   | TAATCCTACTTCAAGGCCCCA    |                       |
|         | 6          | dna2243   | AGTGTAGACAGAAGCGAGCA     |                       |
|         |            | dna2244   | ATGAGATAGGGAATGTCTCCTTG  |                       |
|         | 7          | dna2245   | GATGACAGAGCTGGGAAACAG    |                       |
|         |            | dna2246   | ATCACAAAGGGGAACCCAAAA    |                       |
|         | 8          | dna2247   | GGTTCCCCTTTGTGATGGGTA    |                       |
|         |            | dna2248   | ACATCAAATACAAAGCATTGAGCC |                       |
|         | HES7       | 1         | dna2699                  | CAGAAAGCTGCAATTCTGGAG |
|         |            |           | dna2700                  | ACAGCCAGAGTGGAGCAA    |
| 2, 3, 4 |            | dna2227   | GCGAGCTACAGAACTGATCT     |                       |
|         |            | dna2230   | TGGCAGAACAGATAAACGAGA    |                       |
| MESP2   | 1, 2       | dna2231   | TCGCACCTTTGGTCAACATAA    |                       |
|         |            | dna2234   | GAGAAGGAAAGAGCAGCAGAA    |                       |
| LFNG    | v3-1       | dna2960   | TCTCTCTGCAAATCCTTCCCA    |                       |
|         |            | dna2961   | GGCTGGAGATAAAGAGAAGCC    |                       |
|         | v3-2       | dna2962   | AAGACTTTCCAGAAGTCCCCT    |                       |
|         |            | dna2963   | CATGTCAGTGGGATGGGATAC    |                       |
|         | v4         | dna2964   | CATGGGAGACTTGTCACTTGG    |                       |
|         |            | dna2965   | CCCCTCGGAGTTATGTTACG     |                       |
|         | 1          | dna2966   | CCACCCCAGTTTGAAGG        |                       |
|         |            | dna2967   | ATCCAGGACTCTGGAGCTG      |                       |
|         | 2, 3, 4, 5 | dna2968   | CGAGTGGGGAAACCAAGGC      |                       |
|         |            | dna2969   | CTCTGAAACCCAGAGGGAAAGT   |                       |
|         | 6, 7       | dna2253   | CCTCTCCCTGAGGAGTGC       |                       |
|         |            | dna2254   | TAGAGTCATGCCGTTAGAGA     |                       |
|         | v3-3       | dna2970   | CGCTGAGCTACGGTATGTTTG    |                       |
|         |            | dna2971   | CCTAACAGAATTGCCCTCGG     |                       |

1079

1080  
1081

### Extended Data Table 5.4 | Oligos for sgRNA cloning

| Gene         | Target             | Name                      | Sequence                  |
|--------------|--------------------|---------------------------|---------------------------|
| MESP2        | KO1                | MESP2-S-KO1-sgRNA         | caccgTGGCCGGCCGGCGCCAAGGA |
|              |                    | MESP2-AS-KO1-sgRNA        | aaacTCCTTGGCGCCGGCCGGCCAc |
|              | KO2                | MESP2-S-KO2-sgRNA         | caccgACGCCAGACGAGCGCGCAC  |
|              |                    | MESP2-AS-KO2-sgRNA        | aaacGTGCGCGCTCGTCTGGGCGTc |
|              | c.307T             | MESP2-c307T-Xs            | caccgAAAGCGGCGCAACTaGTGCA |
|              |                    | MESP2-c307T-Xas2          | aaacTGCACTAGTTGCGCCGCTTTc |
| c.256delGCCA | MESP2-c256del4-Xs  | caccgGACAGCGGCAGAGCGCGAGC |                           |
|              | MESP2-c256del4-Xas | aaacGCTCGCGCTCTGCCGCTGTc  |                           |
| HES7         | KO1                | HES7-S-KO1-sgRNA          | caccGCAGATGCTCAAGCCGCTTG  |
|              |                    | HES7-AS-KO1-sgRNA         | aaacCAAGCGGCTTGAGCATCTGCc |
|              | KO2                | HES7-S-KO2-sgRNA          | caccgTGCTGCTGCTGGAGCGGACC |
|              |                    | HES7-AS-KO2-sgRNA         | aaacGGTCCGCTCCAGCAGCAGCAc |
| DLL3         | KO1                | DLL3-S-KO1-sgRNA          | caccgCGTCCTCGAGCGGTGCGCAG |
|              |                    | DLL3-AS-KO1-sgRNA         | aaacCTGCGCACCGCTCGAGGACGc |
|              | KO2                | DLL3-S-KO2-sgRNA          | caccgCGGTGAATGCCGATGCCTAG |
|              |                    | DLL3-AS-KO2-sgRNA         | aaacCTAGGCATCGGCATTACCGc  |
| LFNG         | KO2                | LFNG-S-KO2-sgRNA          | caccgCACACGCGGGACGTCTACGT |
|              |                    | LFNG-AS-KO2-sgRNA         | aaacACGTAGACGTCCCGCGTGTGc |

1082  
1083  
1084  
1085

### Extended Data Table 5.5 | MhAX InFusion primers

| Gene  | Name        | Sequence                                             |
|-------|-------------|------------------------------------------------------|
| MESP2 | MESP2-u51-A | GCGAATTGGGTACctcgcacctttggtcaacataa                  |
|       | MESP2-u51-B | CTGCTCGAGAATtaGGGCACGGGCAGCTTGCCGGTGGccaggcgcagcgtct |
|       | MESP2-u51-C | TACGGTACCATCGGGGCACGGGCAGCTTGCCGGTGGcggccggccggccaga |
|       | MESP2-u51-D | TCATGGCCGGTACctcctggagtagataagctggg                  |

1086  
1087  
1088  
1089

### Extended Data Table 5.6 | Genotyping primers

| Gene  | Target Site       | Name          | Sequence                |
|-------|-------------------|---------------|-------------------------|
| MESP2 | 5' arm            | MESP2-5'F     | GTTTTGACACCTCTCTGCAAC   |
|       |                   | pDestPT35-R2  | AGCTTGGCGTAATCATGGTC    |
|       | Spanning          | MESP2-5'F     | GTTTTGACACCTCTCTGCAAC   |
|       |                   | MESP2-Exon2-R | GAGAAGGAAAGAGCAGCAGAA   |
|       | 3' arm            | SV40-polyA-4  | GGACAAACCACAACCTAGAATGC |
|       |                   | MESP2-Exon2-R | GAGAAGGAAAGAGCAGCAGAA   |
|       | 3' external probe | MESP2-Exon2-F | CATACCATGGCAACCAGCC     |
|       |                   | MESP2-Exon2-R | GAGAAGGAAAGAGCAGCAGAA   |

1090  
1091  
1092  
1093  
1094  
1095  
1096

1097  
1098  
1099  
1100

**Extended Data Table 6 | Antibodies used in this study**

**Extended Data Table 6.1 | Primary antibodies used for immunostaining**

| Primary Antibodies | Company          | Catalog Number | Dilution |
|--------------------|------------------|----------------|----------|
| BRACHYURY          | R&D Systems      | AF2085         | 1:100    |
| COL1               | Southern Biotech | 1310-01        | 1:200    |
| COL2               | Southern Biotech | 1320-01        | 1:200    |
| FOXC2              | DSHB             | 1B6            | 1:10     |
| HNA                | Merck            | MAB1281        | 1:50     |
| MESP2              | DSHB             | 1D4            | 1:10     |
| MYH                | Abcam            | ab91506        | 1:2000   |
| MYOSIN             | DSHB             | MF20-s         | 1:20     |
| PAX7               | DSHB             | PAX7-s         | 1:10     |
| SAA                | Abcam            | ab9465         | 1:1000   |
| TBX6               | R&D Systems      | AF4744         | 1:100    |
| TCF15              | Abcam            | ab204045       | 1:50     |

1101  
1102  
1103  
1104

**Extended Data Table 6.2 | Secondary antibodies used for immunostaining**

| Secondary Antibodies                          | Company    | Catalog Number | Dilution |
|-----------------------------------------------|------------|----------------|----------|
| Alexa Fluor® 488 Donkey Anti-Rabbit IgG (H+L) | Invitrogen | A-21206        | 1:500    |
| Alexa Fluor® 488 Goat Anti-Mouse IgG (H+L)    | Invitrogen | A-10680        | 1:500    |
| Alexa Fluor® 555 Donkey Anti-Goat IgG H&L     | Abcam      | ab150130       | 1:500    |
| Alexa Fluor® 555 Goat Anti-Mouse IgG (H+L)    | Invitrogen | A-21422        | 1:500    |
| Alexa Fluor® 647 Donkey Anti-Mouse IgG (H+L)  | Invitrogen | A-31571        | 1:500    |
| Donkey Anti-Rabbit IgG Cy3                    | Merck      | AP182C         | 1:500    |

1105  
1106  
1107  
1108

**Extended Data Table 6.3 | Antibodies used for flow cytometric analysis**

| Antibodies                     | Company        | Catalog Number | Dilution | Application                 |
|--------------------------------|----------------|----------------|----------|-----------------------------|
| DLL1-APC                       | R&D Systems    | FAB1818A       | 1:200    | Primary antibody            |
| TBX6                           | R&D Systems    | AF4744         | 1:25     | Primary antibody            |
| BRACHYURY-PE                   | R&D Systems    | IC2085P        | 1:50     | Primary antibody            |
| OCT3/4-Alexa Fluor® 647        | BD Biosciences | 560329         | 1:25     | Primary antibody            |
| NANOG-FITC                     | BD Biosciences | 560791         | 1:25     | Primary antibody            |
| PAX6-FITC                      | BD Biosciences | 561664         | 1:25     | Primary antibody            |
| SOX2-BV421                     | BioLegend      | 656114         | 1:50     | Primary antibody            |
| BRACHYURY-PE                   | R&D Systems    | IC2085P        | 1:50     | Primary antibody            |
| NCAM-BV421                     | BioLegend      | 318328         | 1:25     | Primary antibody            |
| SOX17-Alexa Fluor® 647         | BD Biosciences | 561589         | 1:25     | Primary antibody            |
| FOXA2-PE                       | BD Biosciences | 562594         | 1:50     | Primary antibody            |
| Alexa Fluor® 488 Anti-Goat IgG | Abcam          | Ab150129       | 1:50     | Secondary antibody for TBX6 |

|                                      |                |        |       |                                  |
|--------------------------------------|----------------|--------|-------|----------------------------------|
| APC-conjugated Mouse IgG2b, $\kappa$ | BD Biosciences | 555745 | 1:200 | Isotype control for DLL1-APC     |
| Unconjugated Goat IgG                | R&D Systems    | AB108C | 1:25  | Isotype control for TBX6         |
| PE-conjugated Goat IgG               | R&D Systems    | IC108P | 1:50  | Isotype control for BRACHYURY-PE |

1109
