# Supplementary material for: Modeling the Human Segmentation Clock with Pluripotent Stem Cells
Source: bioRxiv or medRxiv preprint supplement (doi:10.1101/562447), 2019-02-27
Supplement: Supplementary file [file media-7.pdf]

## **Extended Data Table 4 | Utilized recombinant proteins and small molecules**

### **Extended Data Table 4.1 | Human recombinant proteins**

| Recombinant Human Protein | Company     | Catalog Number |
|---------------------------|-------------|----------------|
| Activin A                 | R&D Systems | 338-AC         |
| bFGF                      | Wako        | 068-04544      |
| BMP4                      | R&D Systems | 314-BP-050     |

### **Extended Data Table 4.2 | Small molecule agonists/inhibitors**

| Small Molecule | Company             | Catalog Number | Description           |
|----------------|---------------------|----------------|-----------------------|
| CHIR99021      | Axon Medchem        | 1386           | WNT agonist           |
| LDN193189      | Stemgent            | 04-0074        | BMP inhibitor         |
| PD173074       | Tocris              | 3044           | FGFR inhibitor        |
| SAG            | Calbiochem          | 566661         | HH agonist            |
| SB431542       | Selleck Chemicals   | S1067          | TGF $\beta$ inhibitor |
| GDC0449        | Cellagen Technology | C4044-5        | HH inhibitor          |
| XAV939         | Tocris              | 3748           | WNT inhibitor         |
