# Supplementary material for: Modeling the Human Segmentation Clock with Pluripotent Stem Cells
Source: bioRxiv or medRxiv preprint supplement (doi:10.1101/562447), 2019-02-27
Supplement: Supplementary file [file media-8.pdf]

## Extended Data Table 5 | Primers used in this study

### Extended Data Table 5.1 | qRT-PCR primers (differentiation and oscillation)

| Gene       | Forward Primer Sequence | Reverse Primer Sequence |
|------------|-------------------------|-------------------------|
| hALX4      | ATGAATGCTGAGACTTGCCTC   | GGGAAATGCCCTAAAAGGCG    |
| hAMOTL2    | CCTGGGACCAGATGGTCAAT    | GCCACTCTCAGCCATTTAG     |
| hARHGAP24  | TCGGGAACCCACAAATGTT     | GTGCTGGCCTAACTCTCCAG    |
| hAXIN2     | GTATCGTCTGCGGGTCTTCC    | CGAGCTCACACTCAATTCGC    |
| hBCORL1    | AGAGGCTGAAGCTTTCCTCG    | CACCTGCCTGTAGAACTCGG    |
| hT         | CACTGCATCTTTTCGGGACCT   | GACATCGTGGACAGCCAGTA    |
| hCXXC5     | TCAGTGAGCCCCTCAACAAG    | TTGTCAGCAGACTCTCCGC     |
| hDACT1     | CTGAAGAAGCGGGGGCTTA     | ACAAAGGTTTTTTCGGGGTG    |
| hDKK1      | GCACCTTGATGGGTATTCCA    | GCACAACACAATCCTGAGGC    |
| hDLL1      | GGTCCTGCACGAGGTTATAGT   | AACACCAACAAGAAGGCGGAC   |
| hDMRT2     | TCTCGGTGAATGAACCACTGT   | GAGAGACACGAGTGATGGCA    |
| hDUSP5     | TGCCTACCCACTCAACAGTC    | CCGATTCTCCATCCCAGTTT    |
| hFGF18     | TTTCATGAAGCGCTACCCCA    | CTTGGTCACCGTCGTGTACT    |
| hHES7      | CTCGGATCTACCGCTTGG      | TGCTACTTGTCGGTTTTCCG    |
| hHK2       | GCCCCGACAGAAGACATTAGA   | GCTCAGACCTCGCTCCATTT    |
| hHOXA5     | CAATCCTCCTTCTGCGGGTC    | CCTACACGCGCTACCAGAC     |
| hHOXD1     | CACCTACCCCAAGTCCGTCT    | TTTCATCCACTCGAACGTGCT   |
| hJADE1     | GGCTGCCTGAGGAAGTAGTG    | CCGCTTGGCTAGATTGTCCT    |
| hKDM6B     | GTCCATGAAGCACTGCCAGGT   | GTTGCAGTAGTAGGCTGGCTC   |
| hLFNG      | GCCTGCTTGAGGAAGGATT     | AGAAAGGCACCTACGCATCG    |
| Luciferase | CGAGGCTACAAACGCTCTCA    | TTGATCAGGCTCTTCAGCCG    |
| hMAML3     | CCAGACATGACCATTGGCCT    | AGTCGTGGATGCTAACACGG    |
| hMEOX1     | CTCTTGCCCTTTTTGGGGTG    | GAGGGAGGTCAACGTGAGTT    |
| hMESP1     | CGTCAGTTGTCCCTTGTCACTT  | GCTGGCTCTGTTGGAGACCT    |
| hMESP2     | GGCTTCCCTCTTTCCATCCA    | GGAGCCTTGGCTAAAGGAGA    |
| hMIXL1     | GGTACCCCGACATCCACTTG    | ACCTGGAAGAGGGGAGAAAAT   |
| hMSGN1     | CTGCACACCCTCCGGAATTA    | AGGAGGTCTGTGAGTTCCCC    |
| hNOTCH1    | CCAGTCGGAGACGTTGGAAT    | TACTCCTCGCCTGTGGACAA    |
| hPAX1      | CGAAGGCACCGCTTACTCTC    | AAGGCAGGTTTCTCTAGCCC    |
| hPAX9      | CACAACTGTGACATTCCGGC    | GCCGTGACAGAATGACTACCT   |
| hPLEKHG2   | GGCTCTTAGACATTCAGGGC    | AAGACTCCAACCTGGCAACG    |
| hPRICKLE2  | AGCTCGATCGCTTGTGACGTA   | TGATTGGTGTTCCACCTGCT    |
| hPRRX1     | AGGCTTTGGAGCGTGTCTTT    | GTTACCTGCACTCTCGCCTC    |
| hRHOU      | TCAAAGCCGCTCCTACATC     | CTGTTGCTGAGTGTCCGAGT    |
| hSMAD3     | TGAAACACACGAGCAAACCC    | AAAGTGGGGCCAAAGGGTAA    |
| hSPRY4     | CCTGCACCAAACACATGCAC    | ATGCAAGGAGTGTGCATCCC    |
| hTBX6      | GCGCGGTGTATGGTAGAGG     | CTACTCGGCTGCATTTCTGG    |
| hTCF15     | CCTCCTTCTCCAGGGTCCAG    | CAGCTGCTTGAAGGTGAGGG    |
| hTEAD4     | GGCACCATTACCTCCAACGA    | CCCTCTGCGTCATTGTGAT     |
| hUNCX      | GGAGAAGGCGTTCAACGAGA    | GGAACCAGACCTGAACTCGG    |

## Extended Data Table 5.2 | qRT-PCR primers (iPSC quality control)

| Gene    | TaqMan Assay ID | Probe label |
|---------|-----------------|-------------|
| hOCT3/4 | Hs00999634_gH   | FAM/MGB     |
| hNANOG  | Hs02387400_g1   | FAM/MGB     |

| Gene  | Forward Primer Sequence | Reverse Primer Sequence | Probe Sequence     | Probe label |
|-------|-------------------------|-------------------------|--------------------|-------------|
| GAPDH | TGCACCACCAACTGCTTAGC    | TCTTCTGGGTGGCAGTGATG    | ACTCATGACCACAGTCCA | VIC/MGB     |
| cmCAG | GGCTCTGACTGACCGCGTTA    | CAGAAAAGAAACAAGCCGTCATT | TGTAATTAGCGCTTGTT  | FAM/MGB     |

## Extended Data Table 5.3 | Exon genotyping primers

| Gene    | Exon no.   | ID# /Name             | Sequence                 |
|---------|------------|-----------------------|--------------------------|
| DLL3    | 1, 2       | dna2235               | CGACCACAGACGGAATCTC      |
|         |            | dna2236               | CCCCAGTGTGTAGAGTTTAGAG   |
|         | 3          | dna2237               | TGAACTCTGGCCTTCATTGAG    |
|         |            | dna2238               | CTACATCCAGTACCAGGGACA    |
|         | 4          | dna2239               | CTCCGTATGCATCCATGTTCCG   |
|         |            | dna2240               | GTACCCTGAAGAGGGTGAGTG    |
|         | 5          | dna2241               | GTACCATCTAGTCCCGATGATT   |
|         |            | dna2242               | TAATCCTACTTCAAGGCCCCA    |
|         | 6          | dna2243               | AGTGTAGACAGAAGCGAGCA     |
|         |            | dna2244               | ATGAGATAGGGAATGTCTCCTTG  |
|         | 7          | dna2245               | GATGACAGAGCTGGGAAACAG    |
|         |            | dna2246               | ATCACAAAGGGGAACCCAAAA    |
|         | 8          | dna2247               | GGTTCCCTTTGTGATGGGTA     |
|         |            | dna2248               | ACATCAAATACAAAGCATTGAGCC |
| HES7    | 1          | dna2699               | CAGAAAGCTGCAATTCTGGAG    |
|         |            | dna2700               | ACAGCCAGAGTGGAGCAA       |
|         | 2, 3, 4    | dna2227               | GCGAGCTACAGAACTGATCT     |
| dna2230 |            | TGGCAGAACAGATAAACGAGA |                          |
| MESP2   | 1, 2       | dna2231               | TCGCACCTTTGGTCAACATAA    |
|         |            | dna2234               | GAGAAGGAAAGAGCAGCAGAA    |
| LFNG    | v3-1       | dna2960               | TCTCTCTGCAAATCCTTCCCA    |
|         |            | dna2961               | GGCTGGAGATAAAGAGAAGCC    |
|         | v3-2       | dna2962               | AAGACTTTCCAGAAGTCCCCT    |
|         |            | dna2963               | CATGTCAGTGGGATGGGATAC    |
|         | v4         | dna2964               | CATGGGAGACTTGTCACTTGG    |
|         |            | dna2965               | CCCCTCGGAGTTATGTTACAG    |
|         | 1          | dna2966               | CCACCCAGTTTGCAAGG        |
|         |            | dna2967               | ATCCAGGACTCTGGAGCTG      |
|         | 2, 3, 4, 5 | dna2968               | CGAGTGGGAAACCAAGGC       |
|         |            | dna2969               | CTCTGAAACCCAGAGGGAAGT    |
|         | 6, 7       | dna2253               | CCTCTCCCTGAGGAGTGC       |
|         |            | dna2254               | TAGAGTCATGCCGCTTAGAGA    |
|         | v3-3       | dna2970               | CGCTGAGCTACGGTATGTTTG    |
|         |            | dna2971               | CCTAACAGAATTGCCCTCGG     |

### Extended Data Table 5.4 | Oligos for sgRNA cloning

| Gene         | Target             | Name                      | Sequence                  |
|--------------|--------------------|---------------------------|---------------------------|
| MESP2        | KO1                | MESP2-S-KO1-sgRNA         | caccgTGGCCGGCCGGCGCCAAGGA |
|              |                    | MESP2-AS-KO1-sgRNA        | aaacTCCTTGGCGCCGGCCGGCCAc |
|              | KO2                | MESP2-S-KO2-sgRNA         | caccgACGCCCAGACGAGCGCGCAC |
|              |                    | MESP2-AS-KO2-sgRNA        | aaacGTGCGCGCTCGTCTGGGCGTc |
|              | c.307T             | MESP2-c307T-Xs            | caccgAAAGCGGCGCAACTaGTGCA |
|              |                    | MESP2-c307T-Xas2          | aaacTGCACtAGTTGCGCCGCTTtc |
| c.256delGCCA | MESP2-c256del4-Xs  | caccgGACAGCGGCAGAGCGCGAGC |                           |
|              | MESP2-c256del4-Xas | aaacGCTCGCGCTCTGCCGCTGTc  |                           |
| HES7         | KO1                | HES7-S-KO1-sgRNA          | caccGCAGATGCTCAAGCCGCTTG  |
|              |                    | HES7-AS-KO1-sgRNA         | aaacCAAGCGGCTTGAGCATCTGC  |
|              | KO2                | HES7-S-KO2-sgRNA          | caccgTGCTGCTGCTGGAGCGGACC |
|              |                    | HES7-AS-KO2-sgRNA         | aaacGGTCCGCTCCAGCAGCAGAc  |
| DLL3         | KO1                | DLL3-S-KO1-sgRNA          | caccgCGTCTCGAGCGGTGCGCAG  |
|              |                    | DLL3-AS-KO1-sgRNA         | aaacCTGCGCACCGCTCGAGGACGc |
|              | KO2                | DLL3-S-KO2-sgRNA          | caccgCGGTGAATGCCGATGCCTAG |
|              |                    | DLL3-AS-KO2-sgRNA         | aaacCTAGGCATCGGCATTACCGc  |
| LFNG         | KO2                | LFNG-S-KO2-sgRNA          | caccgCACACGCGGGACGTCTACGT |
|              |                    | LFNG-AS-KO2-sgRNA         | aaacACGTAGACGTCCCGCGTGTGc |

### Extended Data Table 5.5 | MhAX InFusion primers

| Gene  | Name        | Sequence                                             |
|-------|-------------|------------------------------------------------------|
| MESP2 | MESP2-u51-A | GCGAATTGGGTACctcgcacctttggtcaacataa                  |
|       | MESP2-u51-B | CTGCTCGAGAATtaGGGCACGGGCAGCTTGCCGGTGGccaggcgcagcgtct |
|       | MESP2-u51-C | TACGGTACCATCGGGGCACGGGCAGCTTGCCGGTGGcgccggccggccaga  |
|       | MESP2-u51-D | TCATGGCCGGTACctcctggagtagataagctggg                  |

### Extended Data Table 5.6 | Genotyping primers

| Gene  | Target Site       | Name          | Sequence              |
|-------|-------------------|---------------|-----------------------|
| MESP2 | 5' arm            | MESP2-5'F     | GTTTTGACACCTCTCTGCAAC |
|       |                   | pDestPT35-R2  | AGCTTGGCGTAATCATGGTC  |
|       | Spanning          | MESP2-5'F     | GTTTTGACACCTCTCTGCAAC |
|       |                   | MESP2-Exon2-R | GAGAAGGAAAGAGCAGCAGAA |
|       | 3' arm            | SV40-polyA-4  | GGACAAACCACAAGTGAATGC |
|       |                   | MESP2-Exon2-R | GAGAAGGAAAGAGCAGCAGAA |
|       | 3' external probe | MESP2-Exon2-F | CATACCATGGCAACCAGCC   |
|       |                   | MESP2-Exon2-R | GAGAAGGAAAGAGCAGCAGAA |
