# Supplementary material for: Modeling the Human Segmentation Clock with Pluripotent Stem Cells
Source: bioRxiv or medRxiv preprint supplement (doi:10.1101/562447), 2019-02-27
Supplement: Supplementary file [file media-9.pdf]

## Extended Data Table 6 | Antibodies used in this study

### Extended Data Table 6.1 | Primary antibodies used for immunostaining

| Primary Antibodies | Company          | Catalog Number | Dilution |
|--------------------|------------------|----------------|----------|
| BRACHYURY          | R&D Systems      | AF2085         | 1:100    |
| COL1               | Southern Biotech | 1310-01        | 1:200    |
| COL2               | Southern Biotech | 1320-01        | 1:200    |
| FOXC2              | DSHB             | 1B6            | 1:10     |
| HNA                | Merck            | MAB1281        | 1:50     |
| MESP2              | DSHB             | 1D4            | 1:10     |
| MYH                | Abcam            | ab91506        | 1:2000   |
| MYOSIN             | DSHB             | MF20-s         | 1:20     |
| PAX7               | DSHB             | PAX7-s         | 1:10     |
| SAA                | Abcam            | ab9465         | 1:1000   |
| TBX6               | R&D Systems      | AF4744         | 1:100    |
| TCF15              | Abcam            | ab204045       | 1:50     |

### Extended Data Table 6.2 | Secondary antibodies used for immunostaining

| Secondary Antibodies                          | Company    | Catalog Number | Dilution |
|-----------------------------------------------|------------|----------------|----------|
| Alexa Fluor® 488 Donkey Anti-Rabbit IgG (H+L) | Invitrogen | A-21206        | 1:500    |
| Alexa Fluor® 488 Goat Anti-Mouse IgG (H+L)    | Invitrogen | A-10680        | 1:500    |
| Alexa Fluor® 555 Donkey Anti-Goat IgG H&L     | Abcam      | ab150130       | 1:500    |
| Alexa Fluor® 555 Goat Anti-Mouse IgG (H+L)    | Invitrogen | A-21422        | 1:500    |
| Alexa Fluor® 647 Donkey Anti-Mouse IgG (H+L)  | Invitrogen | A-31571        | 1:500    |
| Donkey Anti-Rabbit IgG Cy3                    | Merck      | AP182C         | 1:500    |

### Extended Data Table 6.3 | Antibodies used for flow cytometric analysis

| Antibodies                     | Company        | Catalog Number | Dilution | Application                 |
|--------------------------------|----------------|----------------|----------|-----------------------------|
| DLL1-APC                       | R&D Systems    | FAB1818A       | 1:200    | Primary antibody            |
| TBX6                           | R&D Systems    | AF4744         | 1:25     | Primary antibody            |
| BRACHYURY-PE                   | R&D Systems    | IC2085P        | 1:50     | Primary antibody            |
| OCT3/4- Alexa Fluor® 647       | BD Biosciences | 560329         | 1:25     | Primary antibody            |
| NANOG-FITC                     | BD Biosciences | 560791         | 1:25     | Primary antibody            |
| PAX6-FITC                      | BD Biosciences | 561664         | 1:25     | Primary antibody            |
| SOX2-BV421                     | BioLegend      | 656114         | 1:50     | Primary antibody            |
| BRACHYURY-PE                   | R&D Systems    | IC2085P        | 1:50     | Primary antibody            |
| NCAM-BV421                     | BioLegend      | 318328         | 1:25     | Primary antibody            |
| SOX17-Alexa Fluor® 647         | BD Biosciences | 561589         | 1:25     | Primary antibody            |
| FOXA2-PE                       | BD Biosciences | 562594         | 1:50     | Primary antibody            |
| Alexa Fluor® 488 Anti-Goat IgG | Abcam          | Ab150129       | 1:50     | Secondary antibody for TBX6 |

|                                      |                |        |       |                                  |
|--------------------------------------|----------------|--------|-------|----------------------------------|
| APC-conjugated Mouse IgG2b, $\kappa$ | BD Biosciences | 555745 | 1:200 | Isotype control for DLL1-APC     |
| Unconjugated Goat IgG                | R&D Systems    | AB108C | 1:25  | Isotype control for TBX6         |
| PE-conjugated Goat IgG               | R&D Systems    | IC108P | 1:50  | Isotype control for BRACHYURY-PE |
